# Supplementary material for: Multi-functional phytoglycogen-derived hydrogel dressings promote the fast closure of diabetic wound in vitro and in vivo
Source: Research Square preprint supplement (doi:10.21203/rs.3.rs-7222605/v1), 2025-09-22
Supplement: Supplementary file 1 [file c94fa5072f48e12d8dad884f.docx]

**Supplementary materials and methods**

**1．Materials**

Commercial dressing Tegaderm was purchased from 3M Company (Sao Paulo, USA). *Staphylococcus aureus* ATCC6538 and *Escherichia coli* ATCC 8739 were obtained from the Beijing Biological Depository Centre (Beijing, China). RAW264.7 macrophage cells and human dermal fibroblasts cells (HDF) were purchased from the Gaining Biological (Shanghai, China). Cell counting kit-8 (CCK-8), antioxidant assay kit, ROS assay kit, and live/dead cell staining kit were purchased from Maokang Biotechnology (Shanghai, China). Primary antibodies including CD31, CD86 and CD206 were obtained from Biolegend (San Diego, USA). The ELISA kits were purchased from Shanghai Enzyme-Linked Biotechnology Co., LTD (Shanghai, China). Anti-p44/42 MAPK (ERK1/2) Antibody (9102), Anti-p44/42 MAPK (Erk1/2) Antibody (9102), Anti-Phospho-p44/42 MAPK (ERK1/2) (Thr202/Tyr204) Antibody (9101), Anti-p38 MAPK Antibody (9212), and Anti-Phospho-p38 MAPK (Thr180/Tyr182) Antibody (9211), Anti-JNK Antibody (9252), Anti-Phospho-JNK (Thr183/Tyr185) Antibody (9255), and Anti-AKT1 Antibody (2938), Anti-Phospho-AKT1 (Ser473) Antibody (9018), Anti-IκB-α Antibody (9242), and Anti-Phospho-IκB-α (Ser32/36) Antibody (9246), Anti-JAK1 Antibody (3344), Anti-Phospho-JAK1(Tyr1034/1035) Antibody (3331), and Anti-STAT6 Antibody (9362), Anti-Phospho-STAT6 (Tyr641) Antibody (56554) were purchased from Cell Signaling Technology (Boston, USA). Anti-NF-κB p65 Antibody (ab32536), Anti-Phospho-NF-κB p65 (Ser536) Antibody (ab76302), and Anti-β-actin Antibody (ab8227), Rabbit Anti-Mouse IgG H&L (HRP) (ab6728), Goat Anti-Rabbit IgG H&L (HRP) (ab205718) were obtained from Abcam (Cambridge, UK).

**2. Methods**

# 2.1 Physicochemical properties of PG-derived hydrogel

At room temperature, the swelling ratio and degradation rate of hydrogel were determined by immersing the sample in PBS solution and weighting them at predetermined time intervals. The swelling ratio was calculated using the following equation[30]:
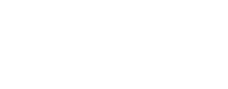

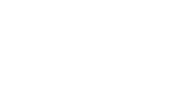
, in which W0 and Wp represent the weight of the initial lyophilized hydrogel and swollen hydrogel, respectively.


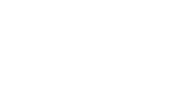


At room temperature, the degradation rate was calculated using the following equation[30]: , in which Wf and Wr represent the weight of the initial hydrogel and remaining hydrogel, respectively.


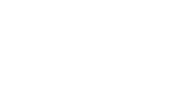

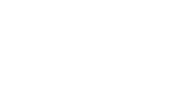


The adhesion properties of hydrogel were characterized by recording the relationship between adhesion force and displacement using a tensile tester. The hardness of hydrogel was analyzed using a texture analyzer. The microstructure characteristics of hydrogel were observed using SEM. Rheological characterizations of hydrogel were analyzed using a rheometer, including frequency sweep, strain sweep, and time sweep tests. The injection performance test involved injecting the hydrogel into the syringe at a constant injection speed of 10 mL/min through an 18G gauge needle, and the shape retention of the hydrogel after injection was recorded. The finger-bending adhesion of the hydrogel was applied to the finger, simulating various movements by altering the bending state of the finger. The adhesive properties of the hydrogel were observed under different motion states. To facilitate observation, the hydrogels were stained with methyl blue and methyl violet, respectively.

# 2.2 Antioxidant capacity of PG-derived hydrogel

The *in vitro* antioxidant capacities of hydrogel were assessed using the DPPH and ABTS scavenging assays. For the DPPH scavenging assay, a fresh ethanol stock solution of DPPH (0.12 mg/mL) was mixed with equal volumes of hydrogel with a concentration range from 1.25 to 150 µg/mL. The mixture was then transferred to a 96-well plate, incubated in the dark for 30 min, and the absorbance at 516 nm was measured using a microplate reader.

For the ABTS scavenging assay, the working solution was prepared by mixing equal volumes of ABTS (10 mM) and K2S2O8 (3.5 mM), followed by incubation in the dark for 16 h. The solution was diluted with PBS (10 mM) to achieve an absorbance of approximately 0.72 at 734 nm. The hydrogel solution at a concentration range from 1.25 to 200 µg/mL was mixed with the ABTS working solution in a volume ratio of 1:4. The mixture was then transferred to a 96-well plate, incubated in the dark for 30 min, and the absorbance at 734 nm was measured.

# 2.3 *In vitro* antibacterial activity of PG-derived hydrogel

*S. aureus* and *E. coli* were employed as model organisms to assess the *in vitro* antimicrobial activity of PG-derived hydrogel. 10 µL aliquot of collected bacterial suspension (1.0×106 CFU/mL) was mixed with hydrogel solution with the concentration range from 40 to 1 mg/mL, and plated on Luria-Bertani agar for 24 h at 37 °C. The bacterial colonies and size of antibacterial zone were counted, and the minimum inhibitory concentration (MIC) was determined using the agar-dilution method. The culture medium with MIC concentration of hydrogel was centrifuged to collect the bacterial precipitates. The bacterial precipitates were washed twice with PBS (0.1 M, pH 7.4), and 2.5% glutaraldehyde solution was added to the bacterial precipitates for fixation. Then, they were washed with 0.1 M PBS twice and finally dehydrated with ethanol solution for 15 min each time. The treated bacteria were freeze-dried and observed by SEM.

# 2.4 Biocompatibility tests of PG-derived hydrogel

The hemolysis assay was used to evaluate the biocompatibility of PG-derived hydrogel. Briefly, 20 mg of sample was carefully mixed with 0.5 mL of PBS and 0.2 mL of fresh mouse erythrocyte solution. The mixture was maintained at 37 °C for 2 h, and then centrifuged at 5,000 rpm for 5 min. The absorbance at 545 nm of collected supernatant was measured using a spectrophotometer. PBS and double-distilled water were the negative and positive controls, respectively. The hemolysis rate (%) was calculated using the following equation: , in which Ah, At and An represent the absorbance of the sample, positive control and negative control, respectively.


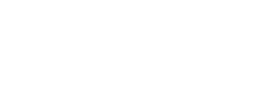


The cytotoxicity assay of the PG-derived hydrogel was evaluated by RAW 264.7 macrophage and HDF cells. The cells (7,500 cells per well) were suspended into 96-well plates and incubated with the sample solution at 37 °C for 24 h. Subsequently, CCK-8 solution was added into each well and incubated for another 2 h. The absorbance was measured at 450 nm, and cell viability was calculated using the equation:

Furthermore, the live/dead cell assays were stained with calcian AM/PI, and observed using a fluorescence microscope (Nikon Tis, Kyoto, Japan).

# 2.5 Cell scratch assays

RAW 264.7 and HDF cells were inoculated into 6-well plates with hydrogel at 37 °C for 24 h until a uniform monolayer of cells formed at the bottom of plate. A scratch was made using a 20 μL pipette tip perpendicular to the plate. The detached cells were gently washed with PBS for three times, and mixed with a serum-free medium containing 400 μL H2O2 for incubation of 24 h at 37 °C. The wells were observed under a microscope at 0 and 24 h to capture images and the scratch area was measured. The wound closure rate at 24 h was calculated using the following equation:


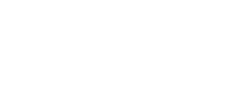

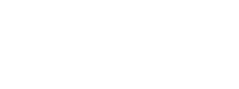


# 2.6 Intracellular ROS assays

Firstly, RAW 264.7 macrophages and HDF cells were separately exposed to 100 μM H₂O₂ for 1 h. Then, the treated cells were seeded into 24-well plates at a density of 6 × 10⁴ cells per well and incubated at 37 °C for 24 h. Thereafter, 100 μL of PG-derived hydrogel was added to each well. For the positive control group, 100 μL of sterile PBS was added to each well. After incubation for 24 h, the cells were washed twice with PBS, and a fluorescent probe DCFH-DA (10 μM) was added. The mixture was incubated in the dark for 30 min at 37 °C, and the fluorescence intensity of intracellular ROS were recorded with a fluorescence microscope (Nikon, Kyoto, Japan).

# 2.7 Diabetic wound healing evaluation

The diabetic male mice model was induced by subcutaneous injection of 1% streptozotocin (STZ) at a dosage of 60 mg/kg for one-week. The mice were considered diabetic when the fasting blood glucose concentration reached 16.7 mmol/mL for two weeks (Figure. S7). Subsequently, the mice should be randomly assigned into three groups (n = 8), including control (PBS), Tegaderm and CPG2-Gel. In the wound healing experiment conducted on diabetic mice, four diabetic mice were randomly selected from each group for the assessment of inflammatory phase indicators on Day 3. The remaining four mice were utilized for the statistical analysis of the wound healing area on Days 3, 7, and 14, as well as for histological evaluation of the wound healing phase on Day 14. A circular full-thickness wound with a diameter of 1 cm was made on the back of mice. The dressings were utilized to cover the wound surface and replaced every other day. Images of the wound sits were captured on days 0, 3, 7, and 14, the wound areas were measured with ImageJ software (NIH, USA). The wound healing rate was also calculated using the following equation: , in which, A0 and An were the wound areas on days 0 and n, respectively.


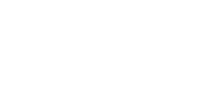


# 2.8 Histological analysis and transcriptome sequencing

To systematically assess the wound healing process, the mice were sacrificed after treatment of days 3 and 14, and the skin tissues were collected and fixed in 4% formaldehyde solution for 24 h for Hematoxylin-eosin (H&E) staining and Masson’s trichrome staining (n = 4). The section was observed under a light microscopy. The immunohistochemical staining with Ki67, PCNA, CD31, CD86 and CD206 antibodies was visualized using a fluorescence microscope.

In addition, the wound tissue of diabetic mice was harvested and homogenized for sequencing. The levels of total antioxidant capacity (T-AOC), total superoxide dismutase (T-SOD), reduced glutathione (GSH), and malondialdehyde (MDA) were measured using an antioxidant assay kit. Also, the levels of wound healing-related factors including IL-6, TNF-α, HMGB-1, TGF-β and VEGF were measured using the ELISA kits.

**2.9 Western Blot**

# After RAW264.7 cells were cultured for 12 h, total protein was extracted after another 24 h incubation in the presence or absence of CPG2-Gel (final concentration 0.01 mg/mL). Protein samples were incubated with p44/42 MAPK (ERK1/2), Phospho-p44/42 MAPK (ERK1/2) (Thr202/Tyr204), p38 MAPK, and Phospho-p38 MAPK in each group (Thr180/Tyr182), JNK, Phospho-JNK (Thr183/Tyr185), AKT1, Phospho-Akt1 (Ser473), NF-κB p65, Phospho-NF-κB p65 Protein expression of (Ser536), IκB-α, Phospho-IκB-α (Ser32/36), JAK1, Phospho-JAK1 (Tyr1034/1035), STAT6, Phospho-STAT6 (Tyr641) overnight at 4 °C. Western Blot system (Criterion™ electrophoresis tank) Trans-Blot® was used to detect the expression of proteins corresponding to each antibody in the cell samples of each group. Image Pro Plus 6.0 software was used to analyze the optical density value, and the relative protein expression was calculated as the target protein gray value/internal reference protein gray value. The proteins expression was normalized using β-actin.

**Table S1** Weight-average molecular weight (MW), mean particle size, z-average root means square radius (RZ), molecular density (ρ), polydispersity, degree of substitution/degree of oxidation and zeta-potential (ζ) of phytoglycogen (PG), cationic PG (CPG) and aldolylated PG (APG).

|  | **MW**  **(g/mol ×107)** | **Mean particle size (nm)** | **RZ**  **(nm)** | **ρ**  **(g/mol⋅nm3)** | **Polydispersity** | **Degree of substitution (%)****a)** |
| --- | --- | --- | --- | --- | --- | --- |
| PG | 1.23 ± 0.03 | 85.27±1.86 | 16.70 ± 0.20 | 210.49 ± 17.08 | 1.86 ± 0.01 | 0 |
| CPG1 | 1.58 ± 0.08 | 135.63±8.14 | 19.10 ± 0.50 | 325.28 ± 16.70 | 1.55 ± 0.02 | 18.50 ± 0.50 |
| CPG2 | 1.87 ± 0.04 | 219.73±18.74 | 22.63 ± 1.15 | 268.37 ± 24.36 | 1.31 ± 0.01 | 38.15 ± 1.67 |
|  | **MW**  **(g/mol ×107)** | **Mean particle size (nm)** | **RZ**  **(nm)** | **ρ**  **(g/mol⋅nm3)** | **Polydispersity** | **Degree of oxidation (%)** |
| APG | 0.52 ± 0.04 | 302.00±35.36 | 13.30 ± 0.43 | 119.6 ± 13.10 | 1.88 ± 0.03 | 35.86 ± 2.94 |

**a)** The degree of substitution denotes the total of the degrees of substitution of amino groups and quaternary ammonium salt groups.

**Table S2** The ABTS scavenging rate of PG derivatives and PG-derived hydrogel at different concentrations.

| **Samples** | **Concentrations(mg/mL)** | **The scavenging rate of ABTS (%)** |
| --- | --- | --- |
| CPG1 | 12.5 | 44.48 ± 2.39 |
| 25 | 69.24 ± 4.69 |
| 50 | 85.12 ± 3.56 |
| 100 | 88.33 ± 2.64 |
| 200 | 96.69 ± 1.20 |
| CPG2 | 1.25 | 8.11 ± 2.09 |
| 2.5 | 33.18 ± 2.93 |
| 5 | 66.44 ± 4.34 |
| 10 | 89.99 ± 1.59 |
| 20 | 98.09 ± 0.82 |
| APG | 0.625 | 49.60 ± 0.47 |
| 1.25 | 59.98 ± 1.16 |
| 2.5 | 78.75 ± 0.93 |
| 5 | 86.00 ± 3.03 |
| 10 | 90.37 ± 0.58 |
| CPG1-Gel | 3.125 | 38.76 ± 5.30 |
| 6.25 | 41.41 ± 4.65 |
| 12.5 | 69.33 ± 1.54 |
| 25 | 72.67 ± 2.69 |
| 50 | 77.17 ± 2.90 |
| CPG2-Gel | 0.625 | 43.36 ± 1.92 |
| 1.25 | 66.06 ± 4.46 |
| 2.5 | 78.46 ± 4.44 |
| 5 | 86.49 ± 1.31 |
| 10 | 91.78 ± 4.59 |

**Table S3** The DPPH scavenging rate of PG derivatives and PG-derived hydrogel at different concentrations.

| **Samples** | **Concentrations(mg/mL)** | **The scavenging rate of DPPH (%)** |
| --- | --- | --- |
| CPG1 | 9.375 | 16.29 ± 2.49 |
| 18.75 | 29.93 ± 2.60 |
| 37.5 | 32.78 ± 0.36 |
| 75 | 41.06 ± 0.93 |
| 150 | 52.99 ± 2.67 |
| CPG2 | 6.25 | 7.65 ± 1.57 |
| 12.5 | 20.16 ± 0.62 |
| 25 | 25.63 ± 0.82 |
| 50 | 41.78 ± 1.64 |
| 100 | 51.72 ± 1.29 |
| APG | 1.5625 | 38.95 ± 0.05 |
| 3.125 | 41.14 ± 0.23 |
| 6.25 | 49.43 ± 3.08 |
| 12.5 | 51.09 ± 0.26 |
| 25 | 64.47 ± 4.87 |
| CPG1-Gel | 3.125 | 7.09 ± 0.62 |
| 6.25 | 11.34 ± 3.09 |
| 12.5 | 19.45 ± 0.82 |
| 25 | 34.00 ± 4.76 |
| 50 | 58.48 ± 1.03 |
| CPG2-Gel | 3.125 | 4.46 ± 0.34 |
| 6.25 | 8.84 ± 0.97 |
| 12.5 | 14.78 ± 1.78 |
| 25 | 37.90 ± 2.69 |
| 50 | 60.72 ± 2.51 |


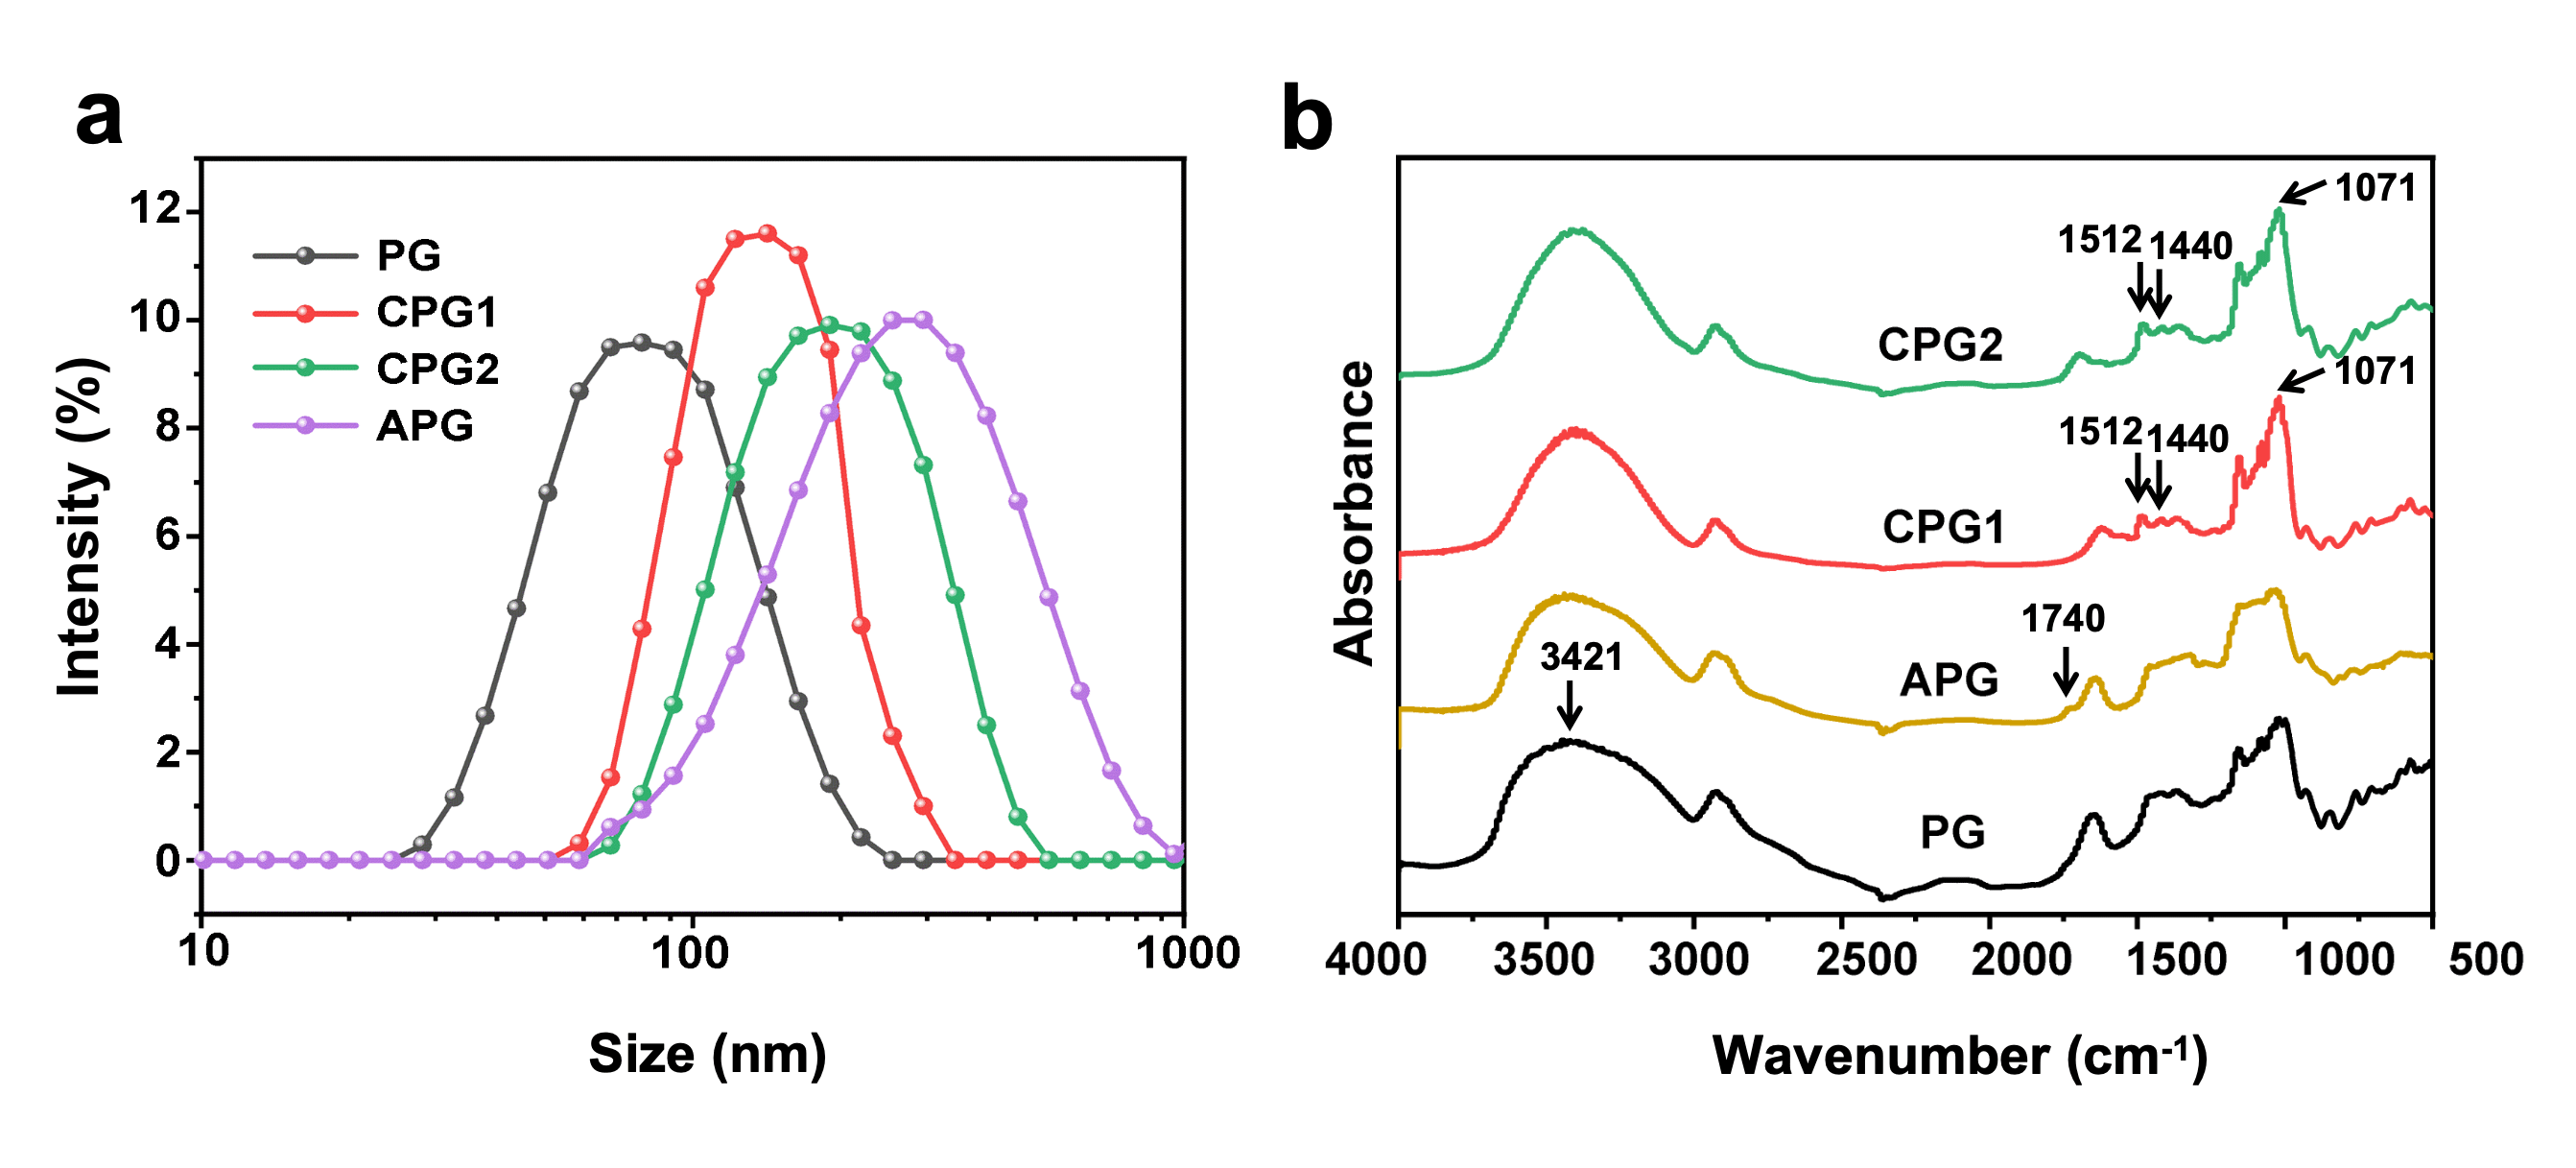
**Figure. S1. Characterization of chemical modified PG and PG-derived hydrogel.** (**a**) Particle size and (**b**) FT-IR spectra of chemical modified.

**
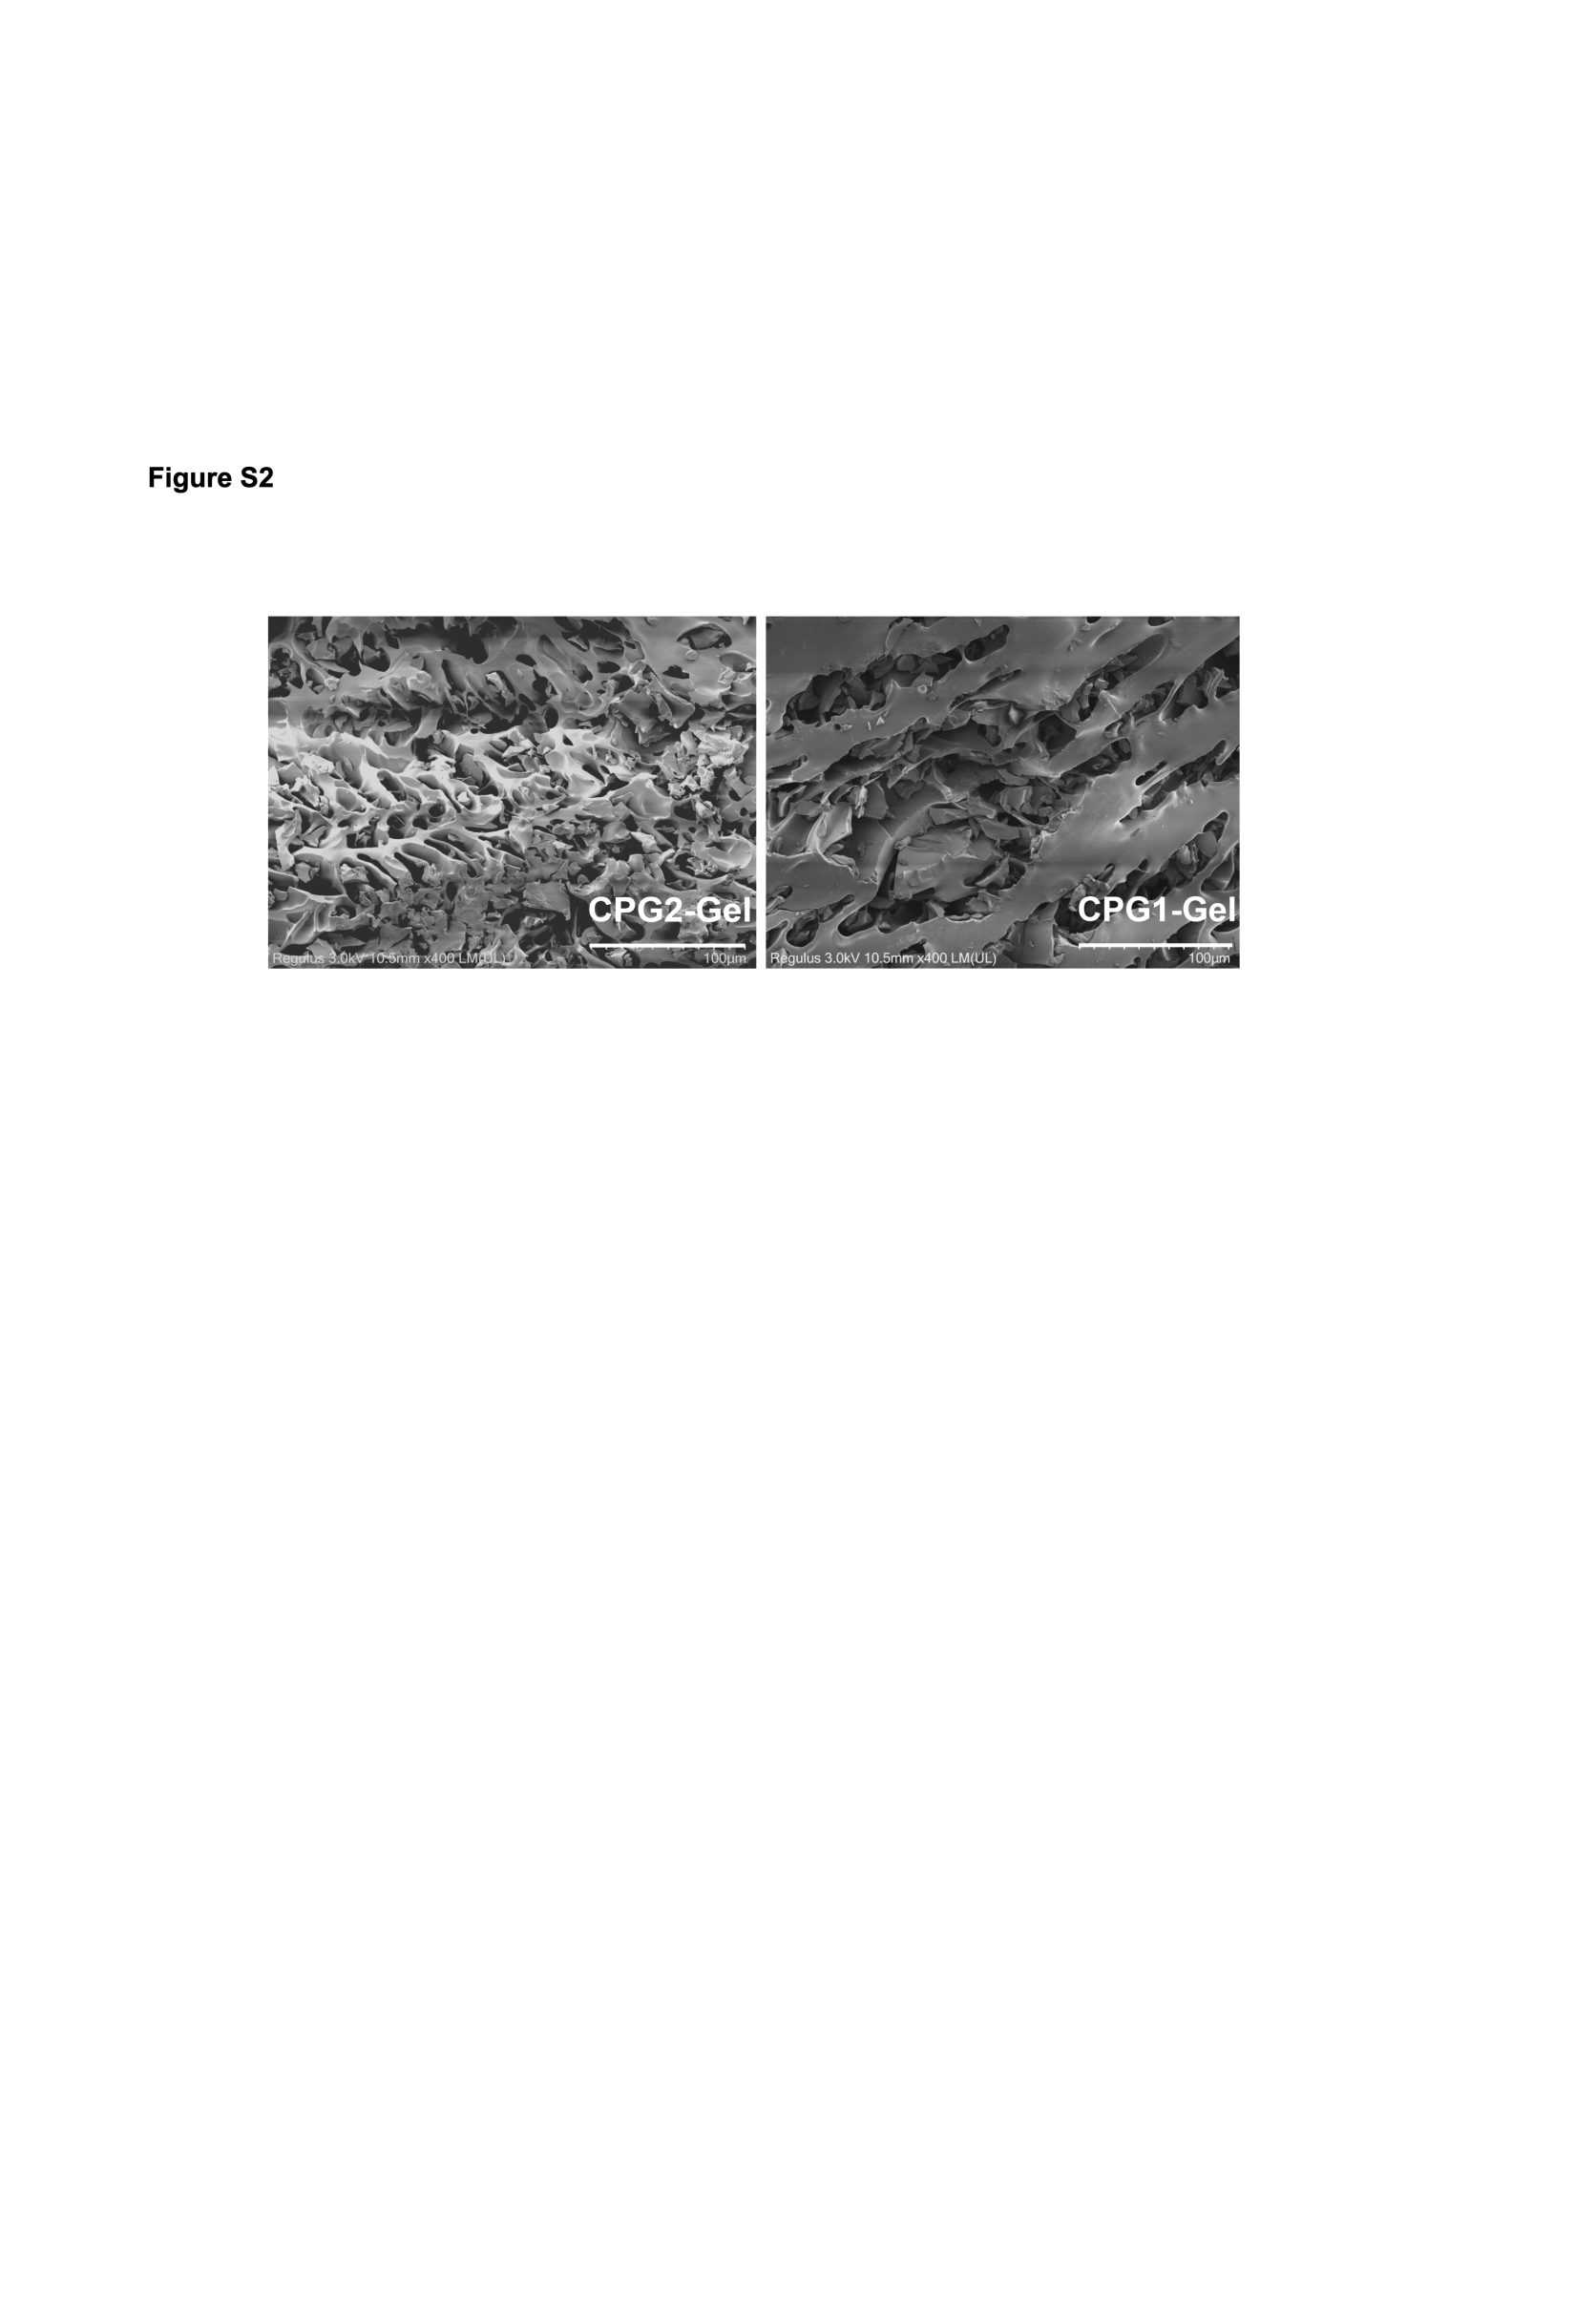
**

**Figure. S2.** SEM image of CPG1-Gel and CPG2-Gel, scale bar, 100 μm.


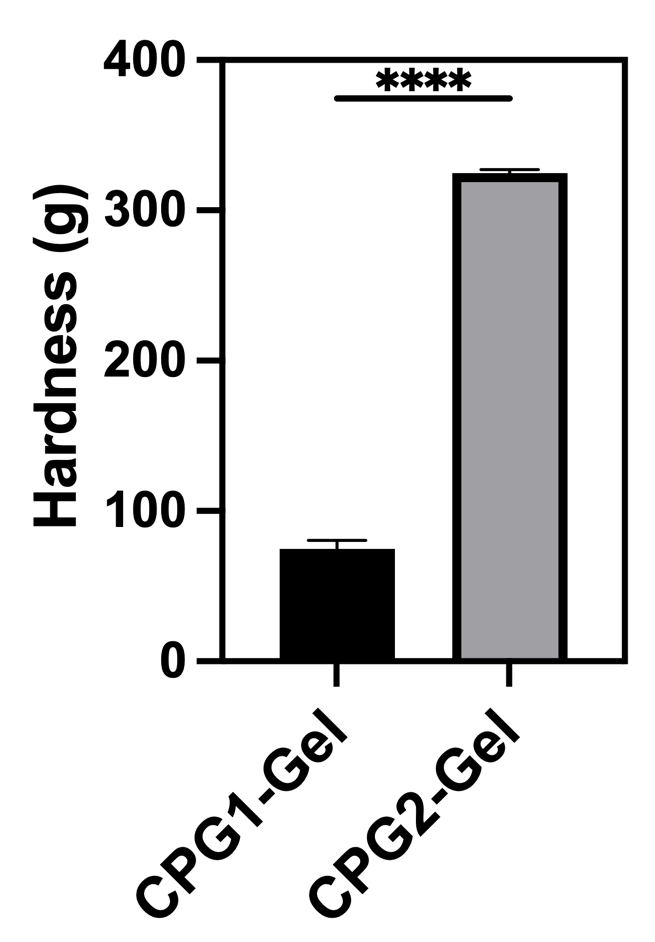


**Figure. S3.** Hardness measurement of PG-derived hydrogel.

**
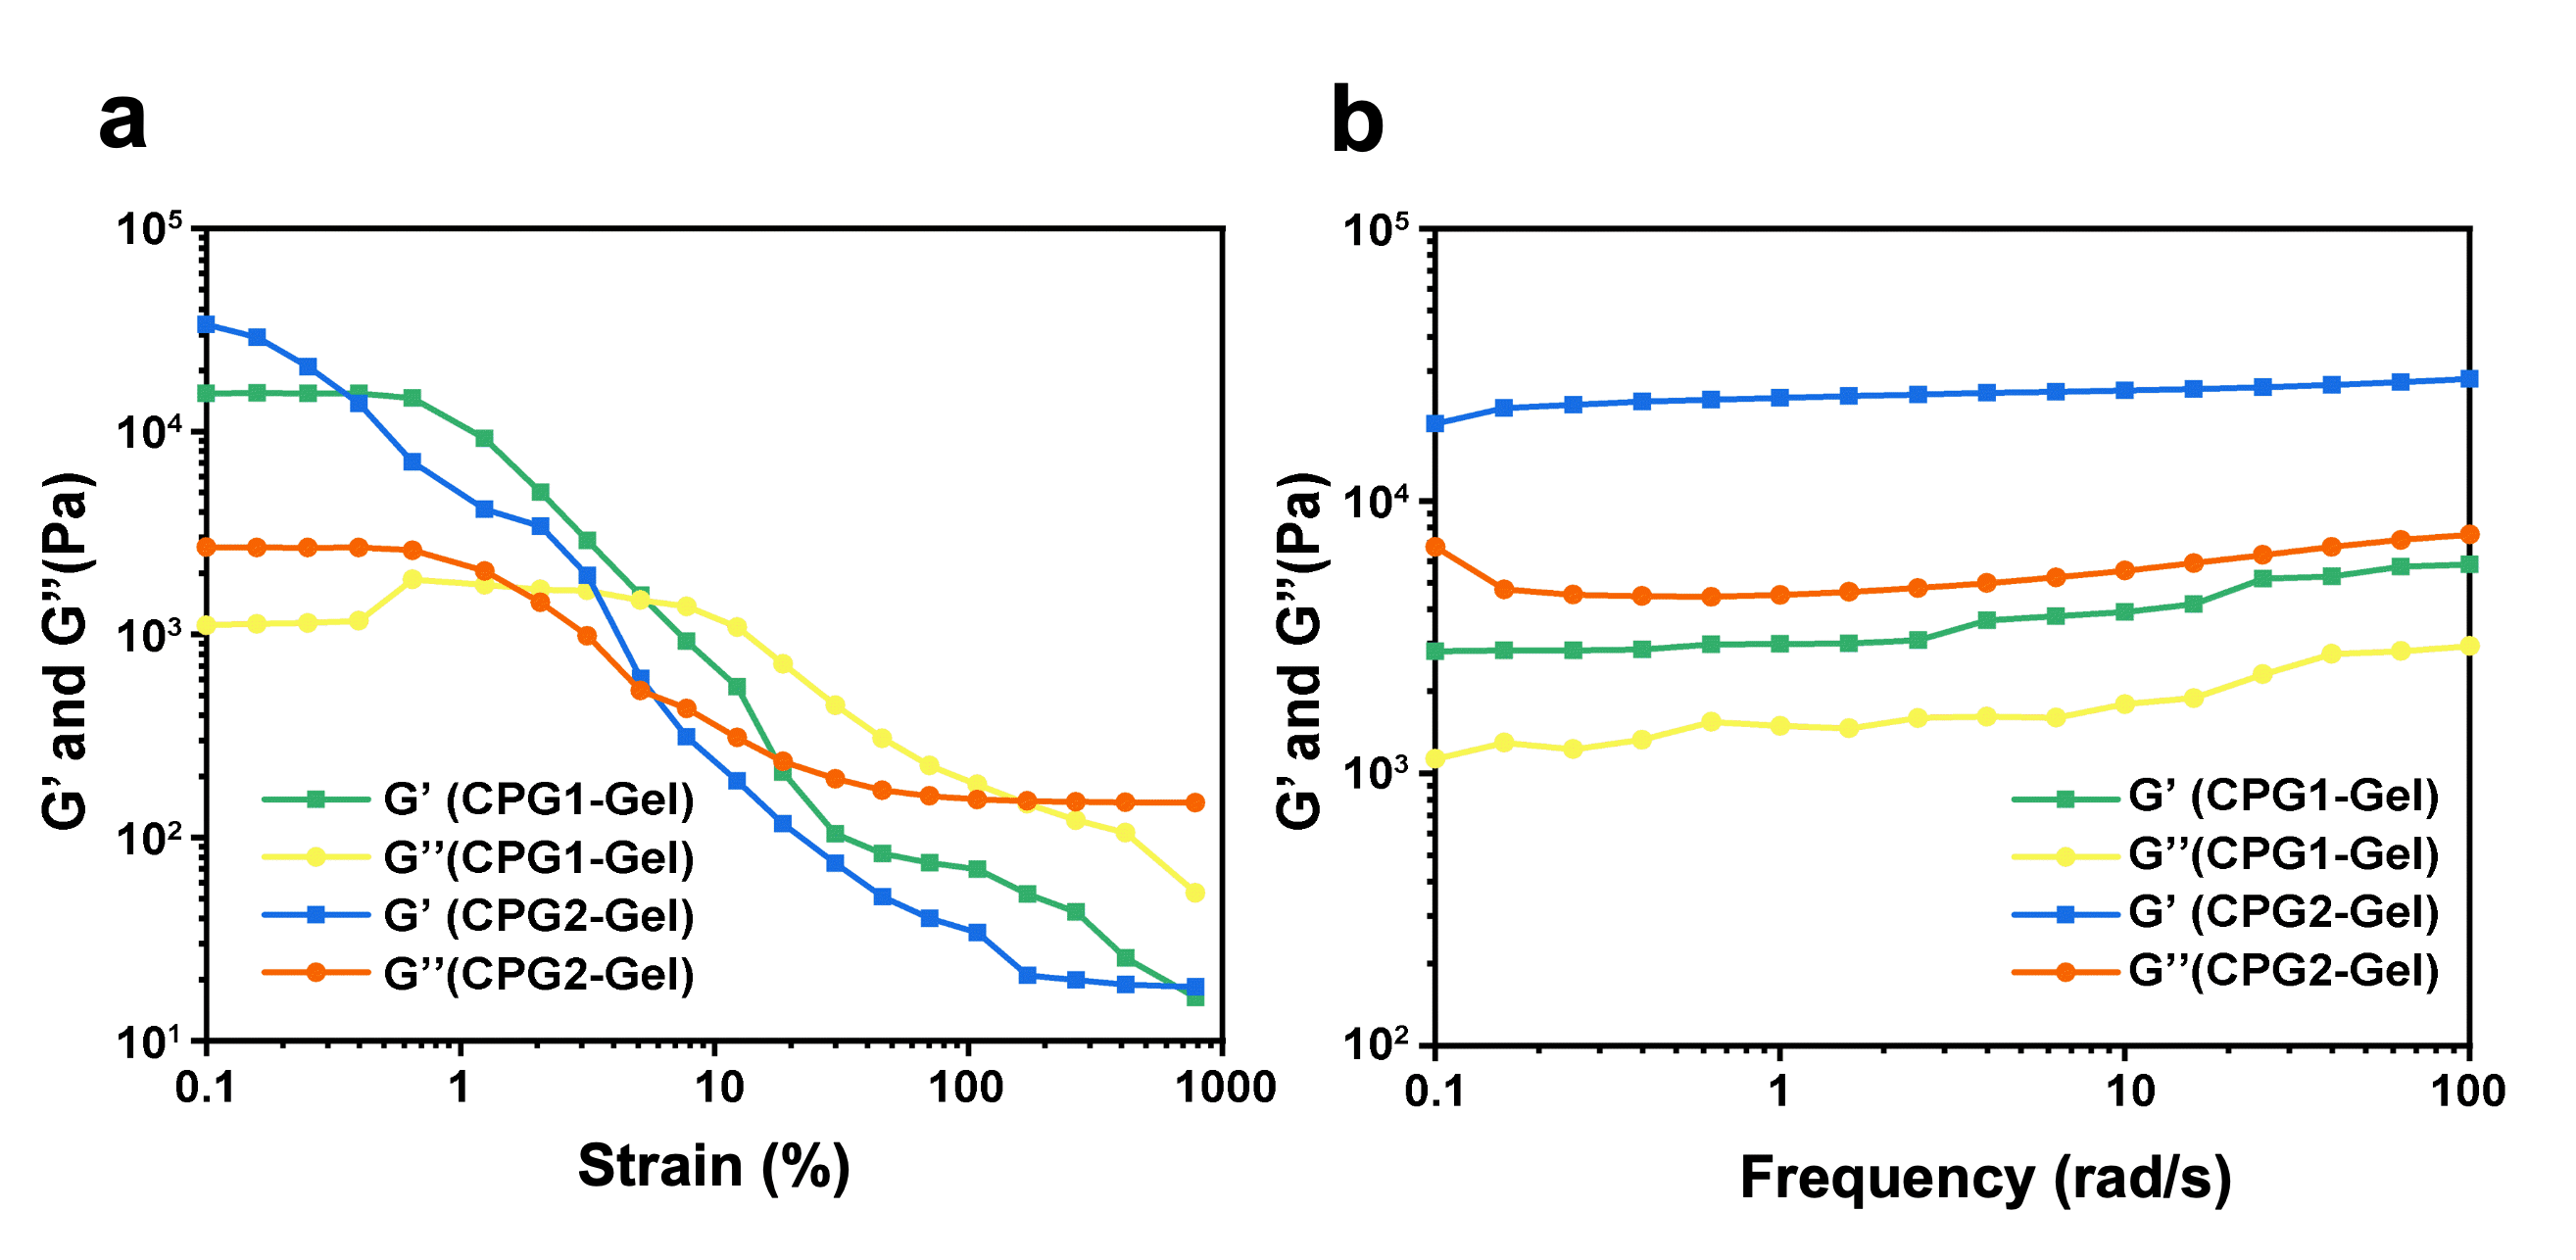
Figure. S4.** (**a**)Strain sweeps and (**b**) frequency sweep of PG-derived hydrogel.

**
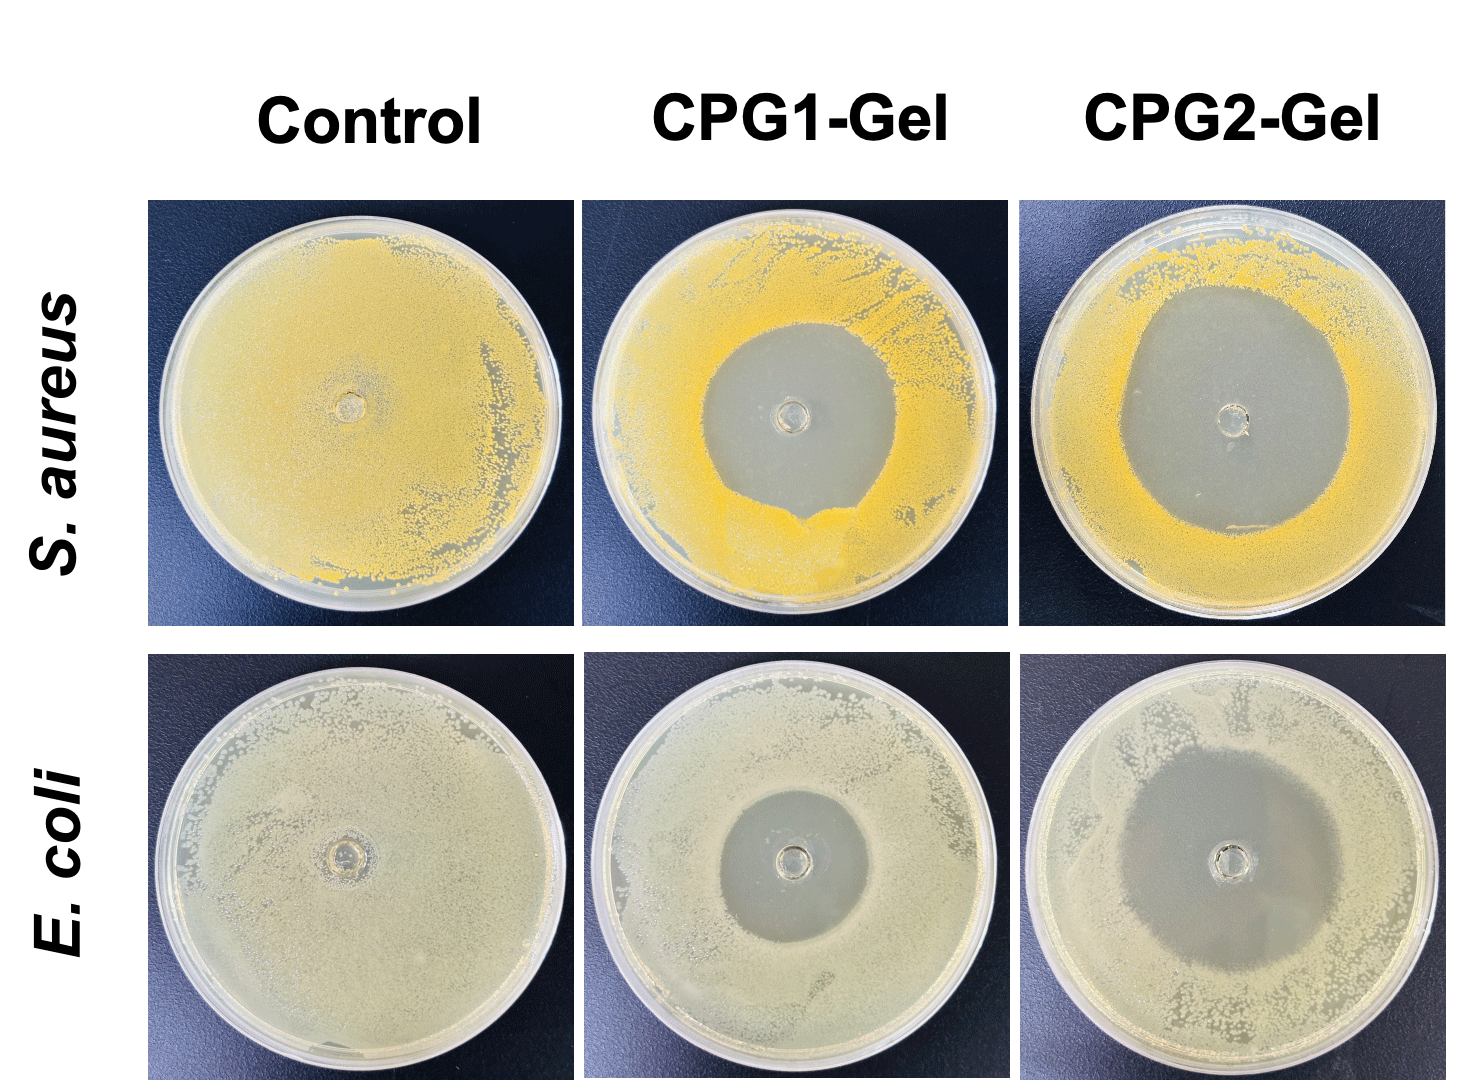
Figure. S5.** Images of antibacterial zone on the culture plates of *S. aureus* and *E. coli* co-cultured with CPG1-Gel and CPG2-Gel.

**
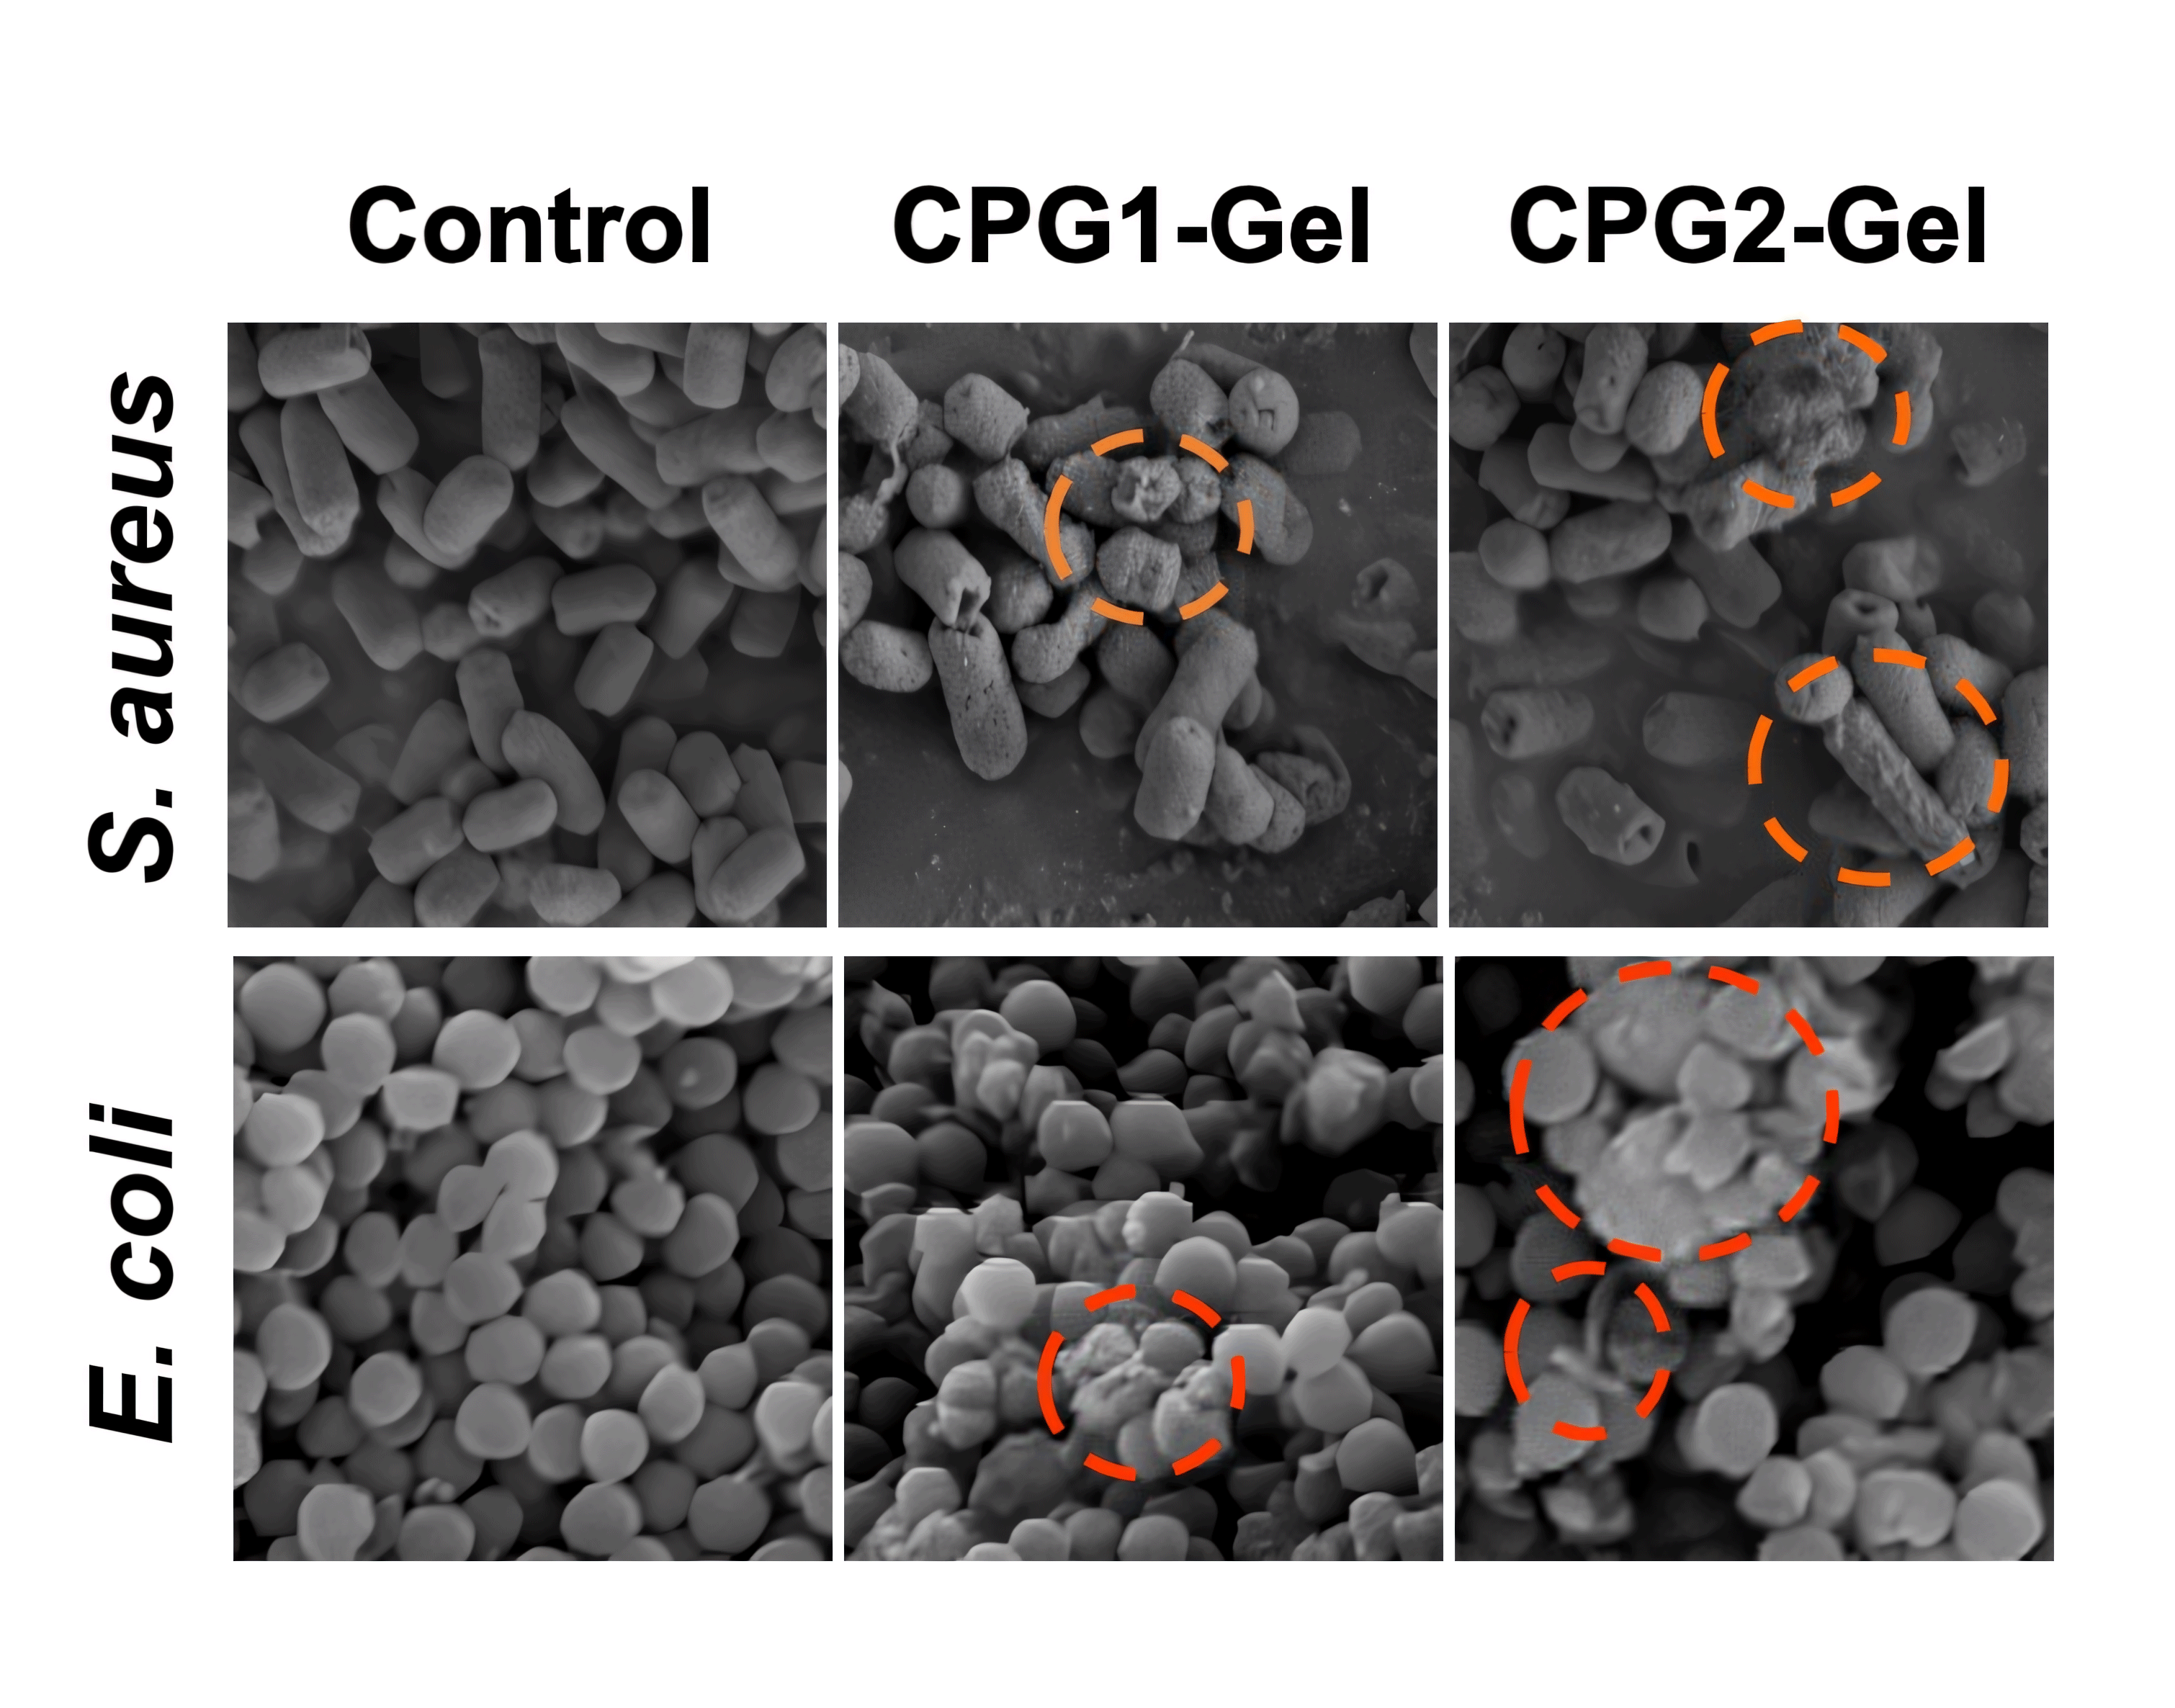
Figure. S6.** SEM image of *S. aureus* and *E. coli* co-cultured with CPG1-Gel. Scale bar, 5 μm.


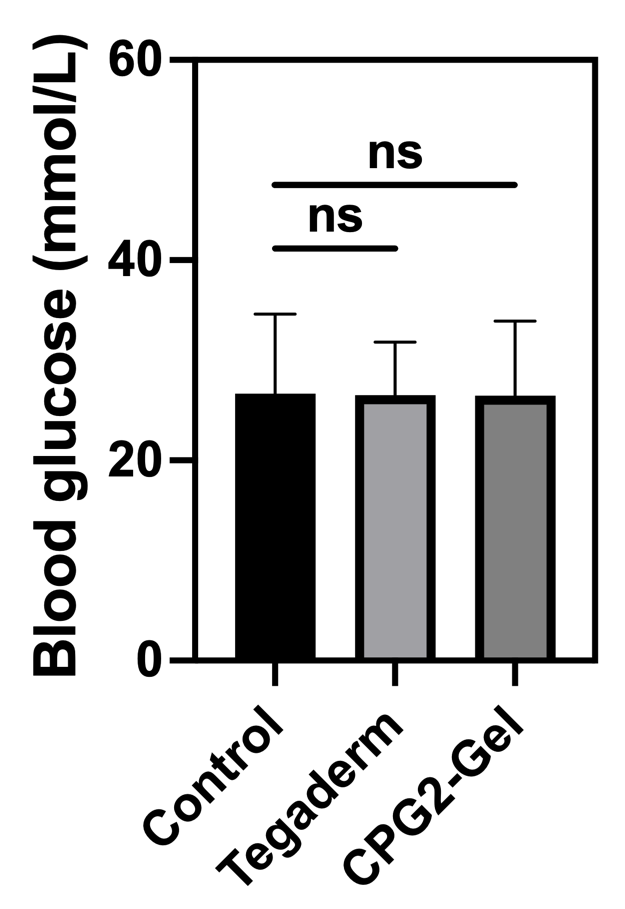


**Figure. S7.** Fasting blood glucose values of diabetic mice in each group after one week of modeling (n = 8).

**
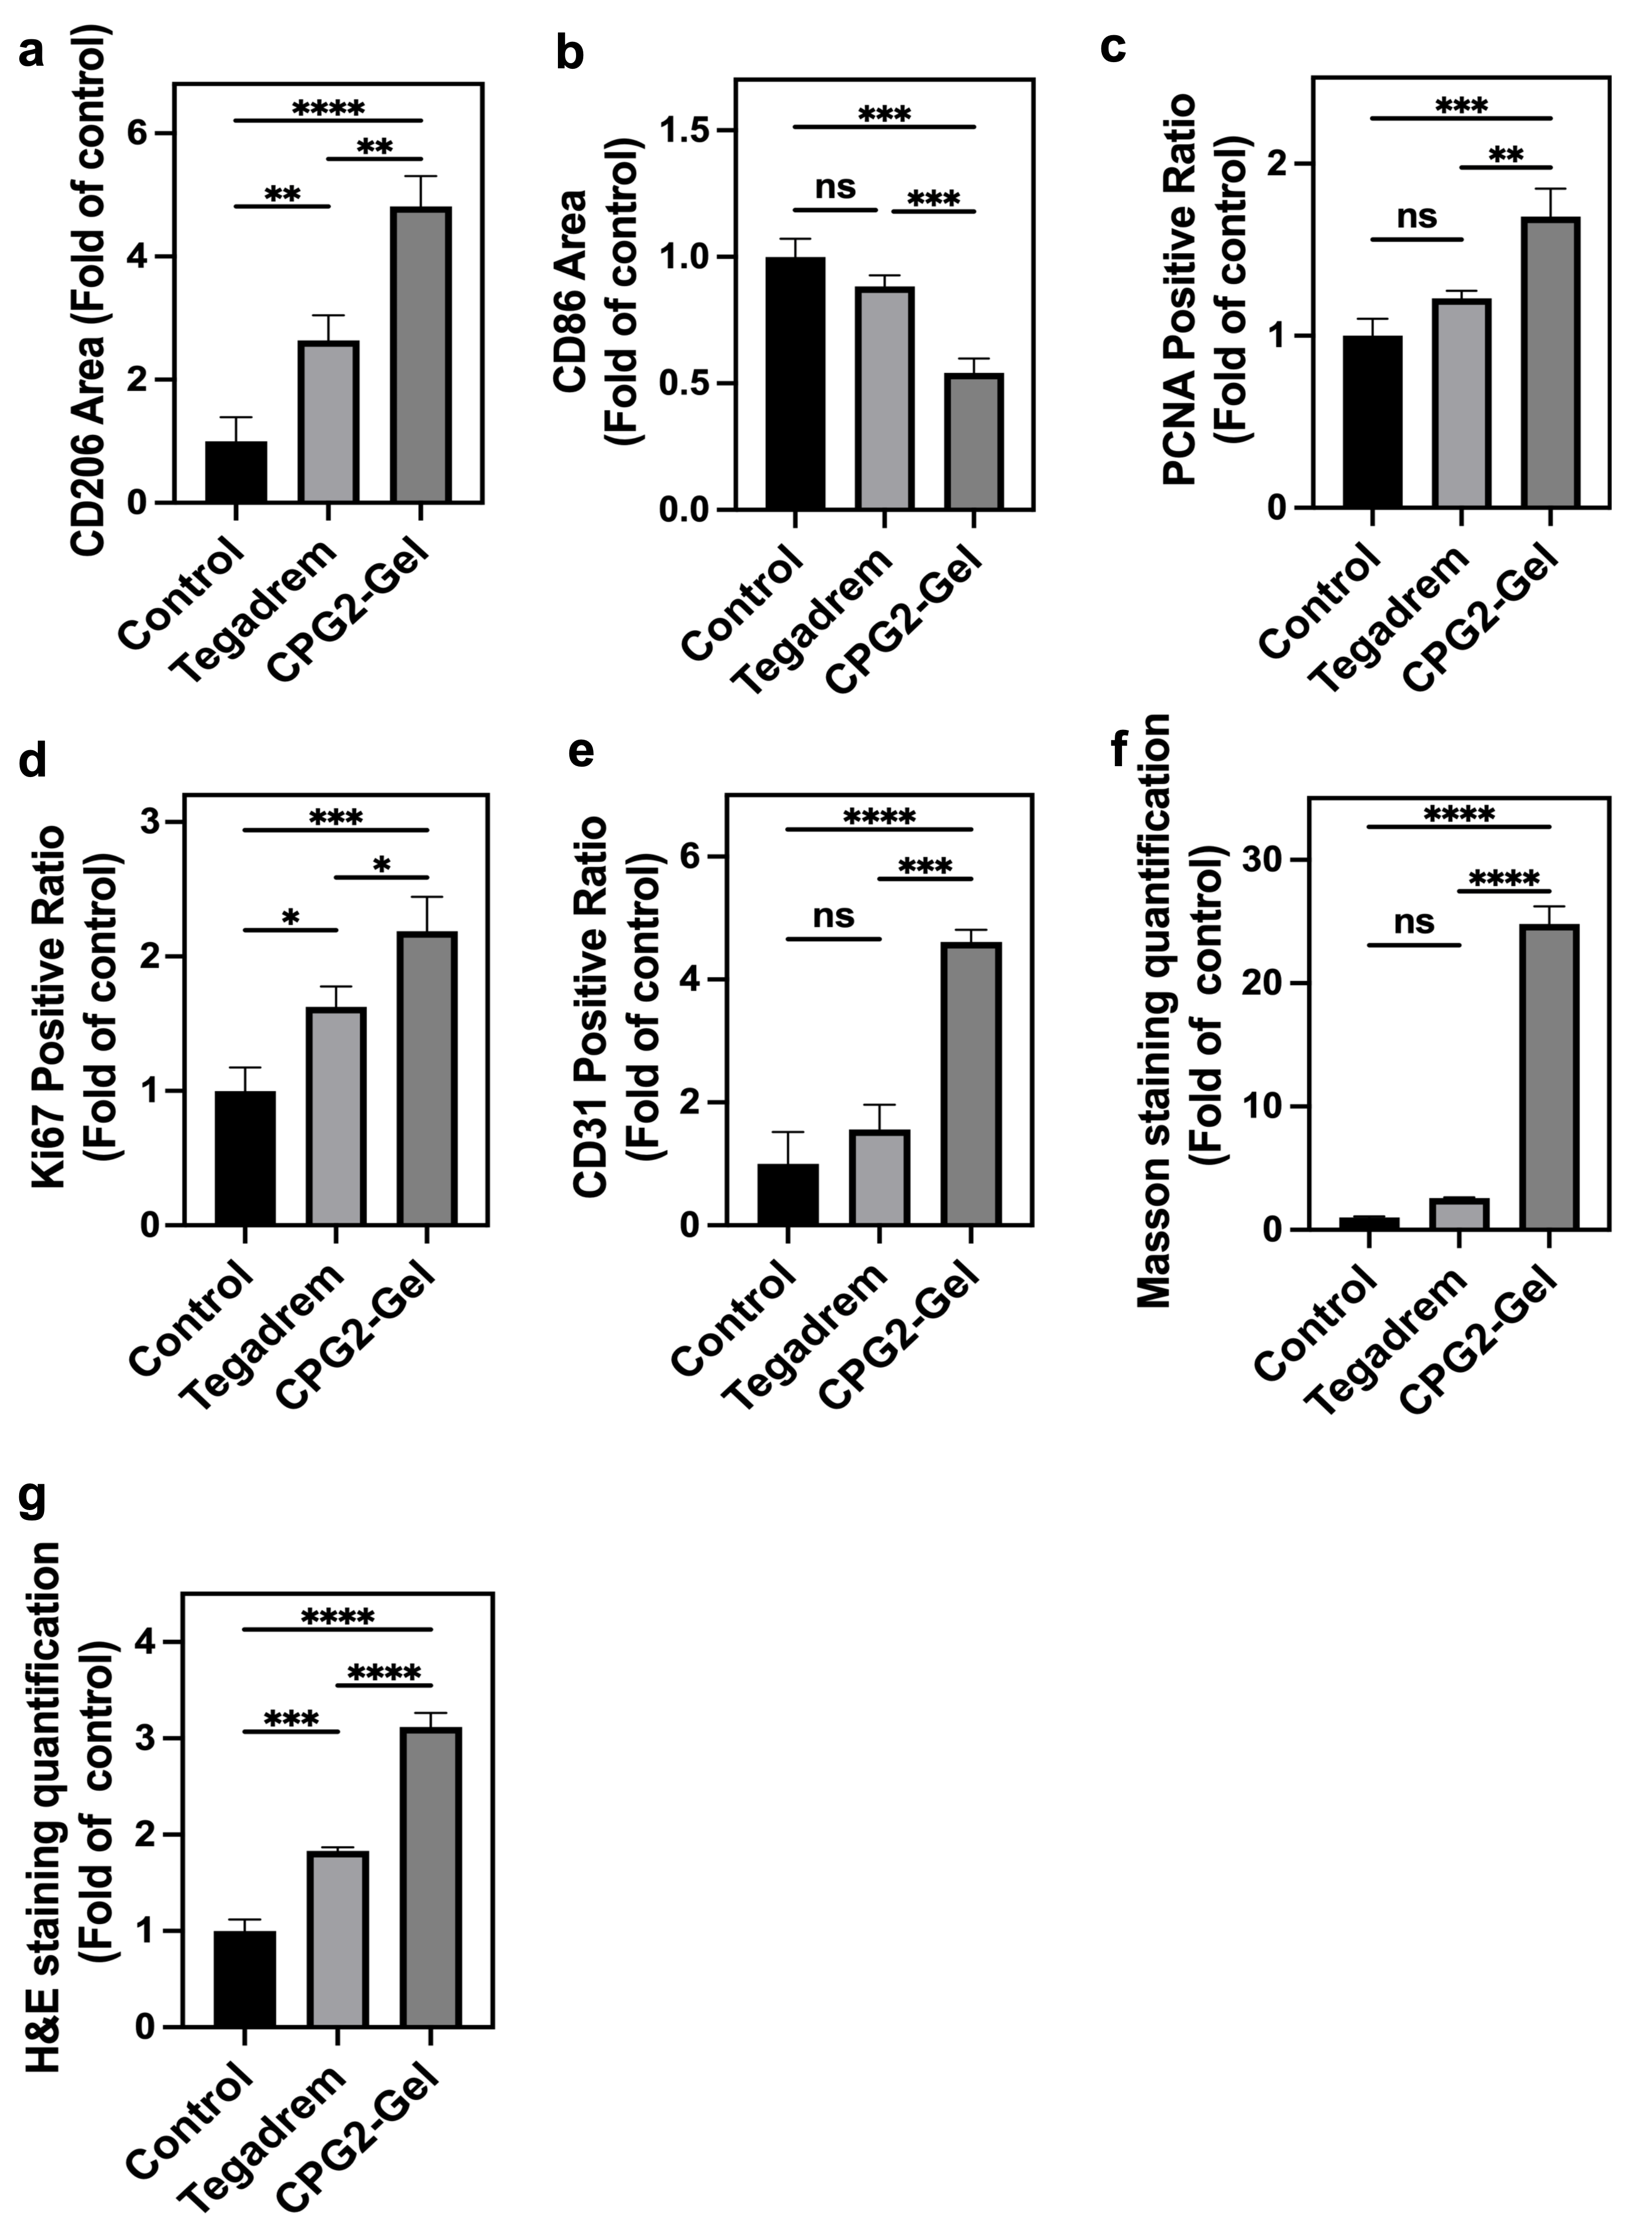
Figure. S8.** Statistical analysis of (**a**) the CD206 and (**b**) CD86 at the wounds on day 3 (n = 4). Statistical analysis of the (**c**) PCNA, (**d**) Ki67, and (**e**) CD31 at the wounds on day 14 (n = 4). (**f**) Masson staining (quantitative staining of tissue fibers) and (**g**) H&E staining (quantitative staining of HDF cells) quantification in wounds skin tissue after treatment for 14 days (n = 4).

**
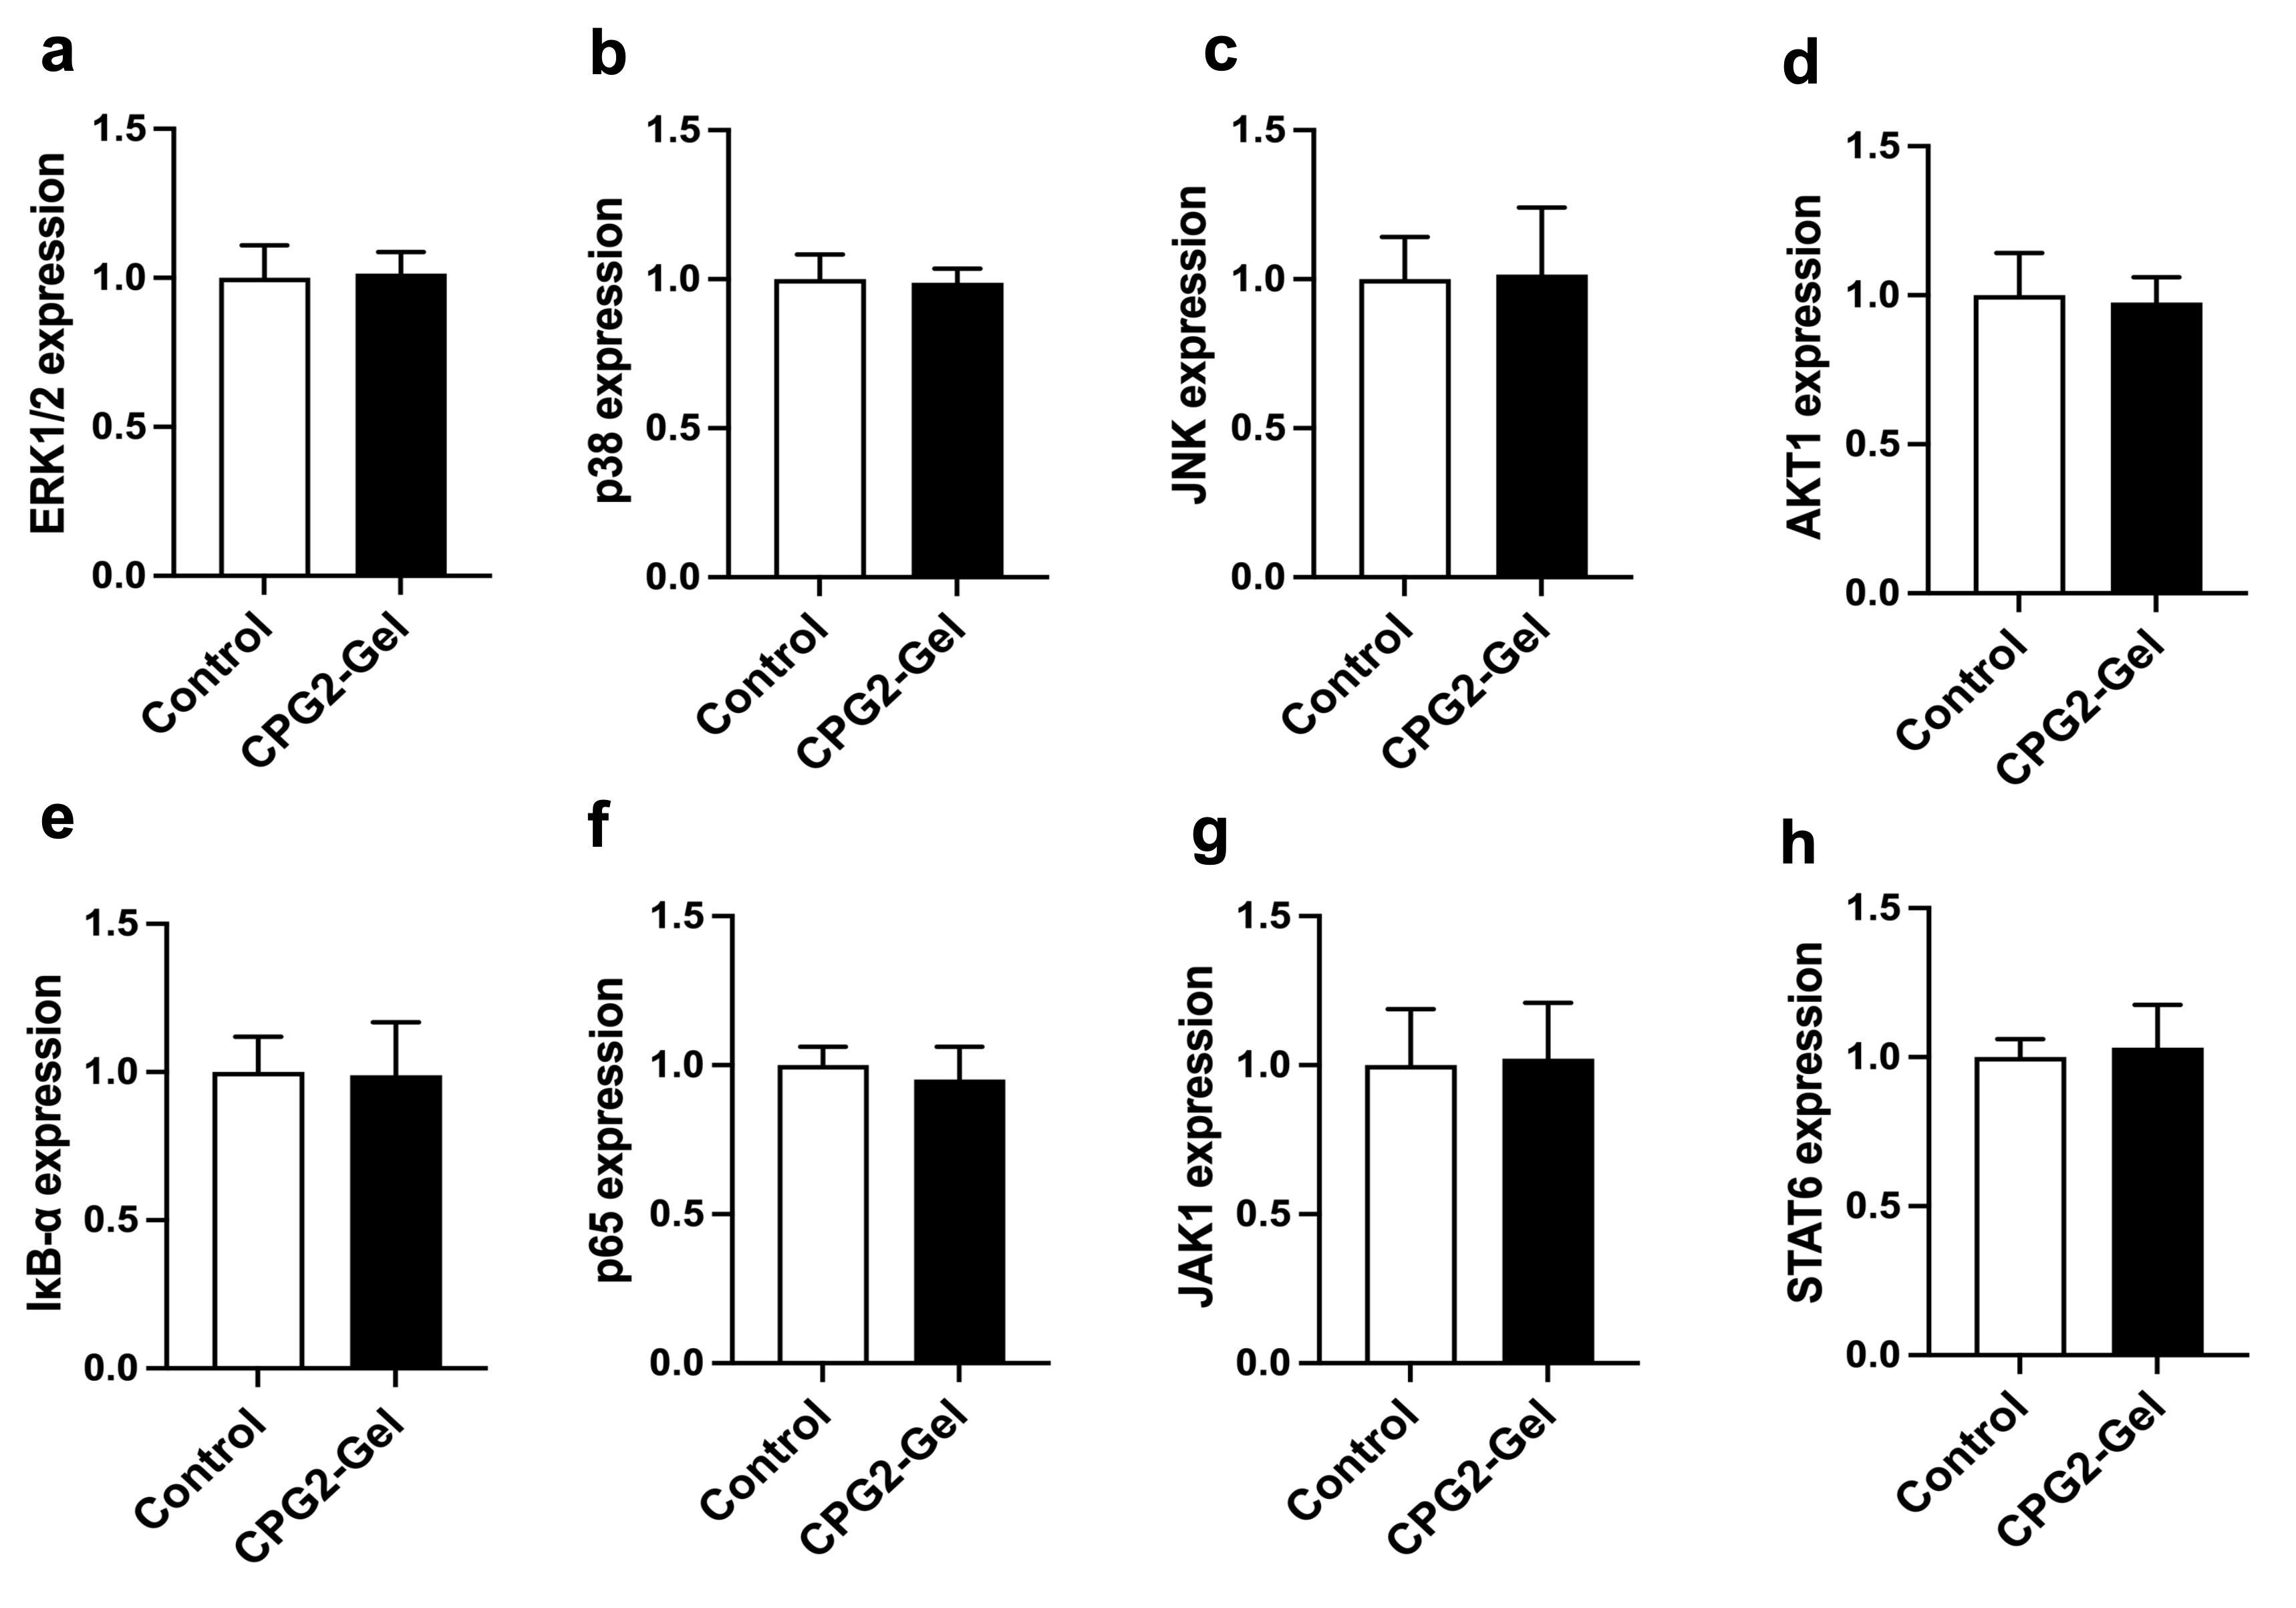
Figure. S9.** The relative expression levels of p44/42 MAPK (ERK1/2) (**a**), p38 MAPK(**b**), JNK (**c**), AKT1 (**d**), IκB-α (**e**), NF-κB p65(**f**), JAK1(**g**), and STAT6(**h**) in various groups of cells by western blot experiments. Results were mean ± SD for three individual experiments. ***P* < 0.01.

**
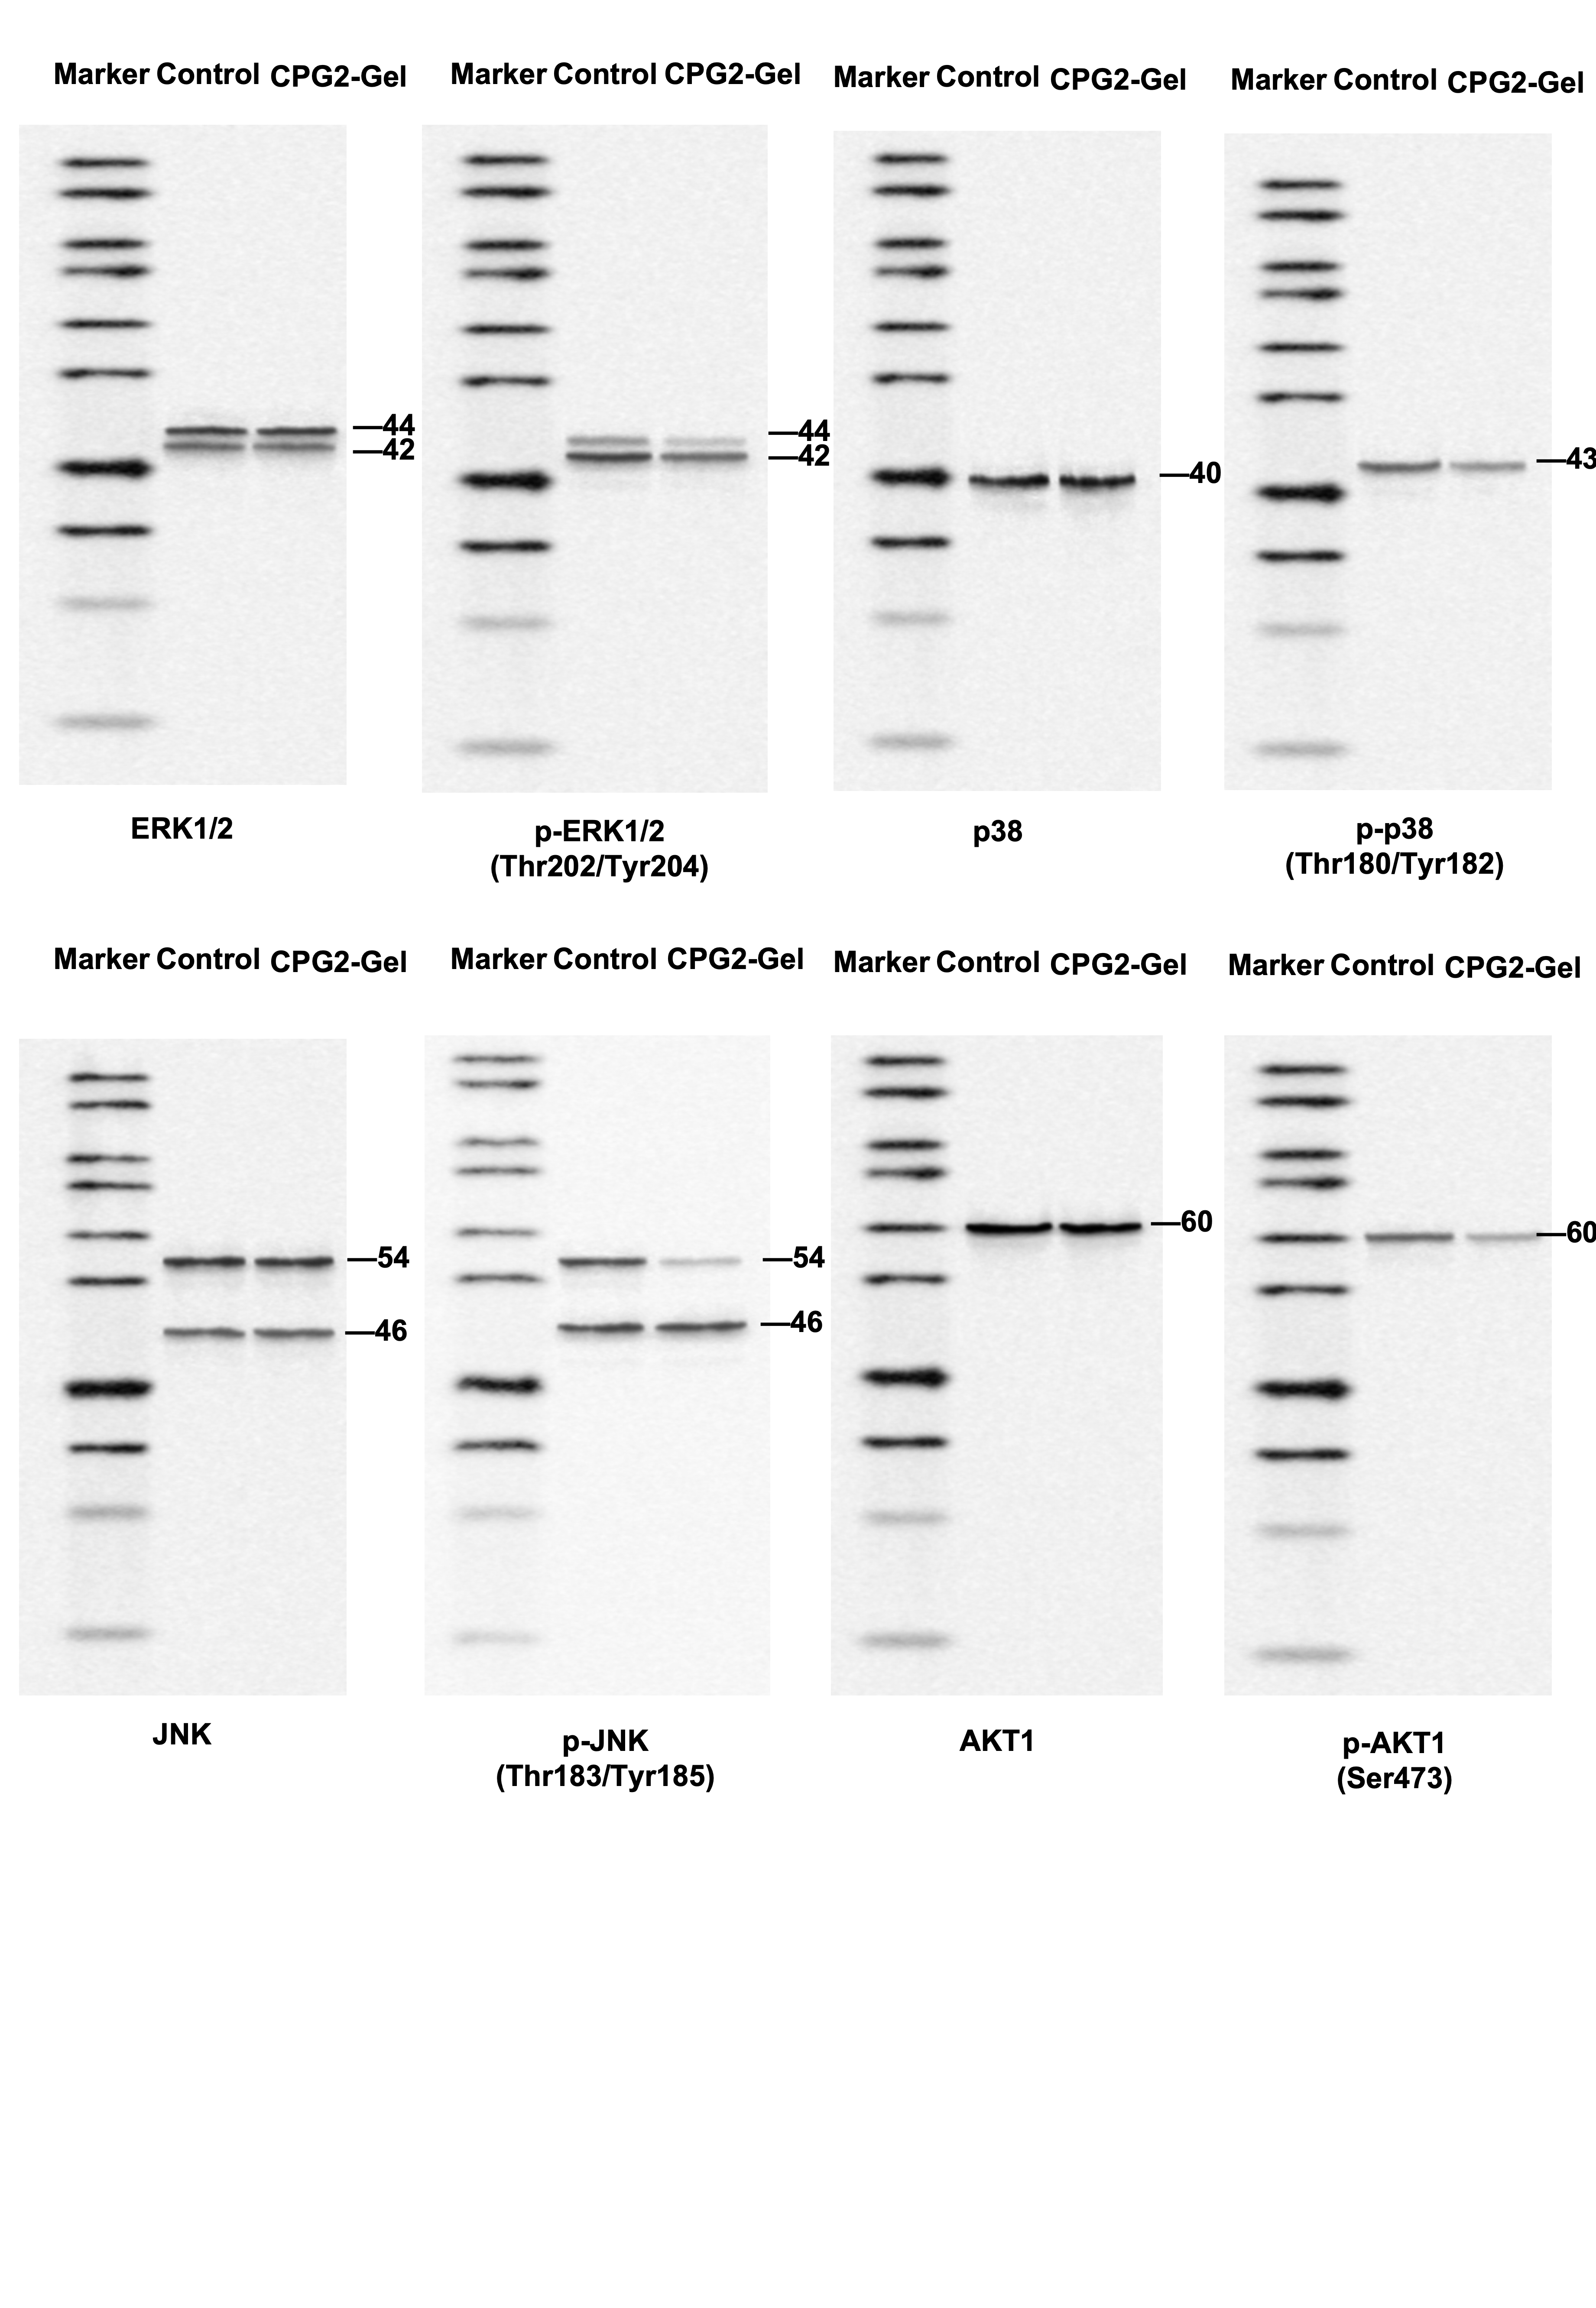
Figure. S10. The related signaling pathways of CPG2-Gel on RAW 264.7 immune regulation and ROS scavenging.** Protein expression of p44/42 MAPK (ERK1/2), Phospho-p44/42 MAPK (ERK1/2) (Thr202/Tyr204), p38 MAPK, Phospho-p38 MAPK (Thr180/Tyr182), JNK, Phospho-JNK (Thr183/Tyr185), AKT1, Phospho-Akt1 (Ser473) in macrophages analyzed by western blot (n = 3).


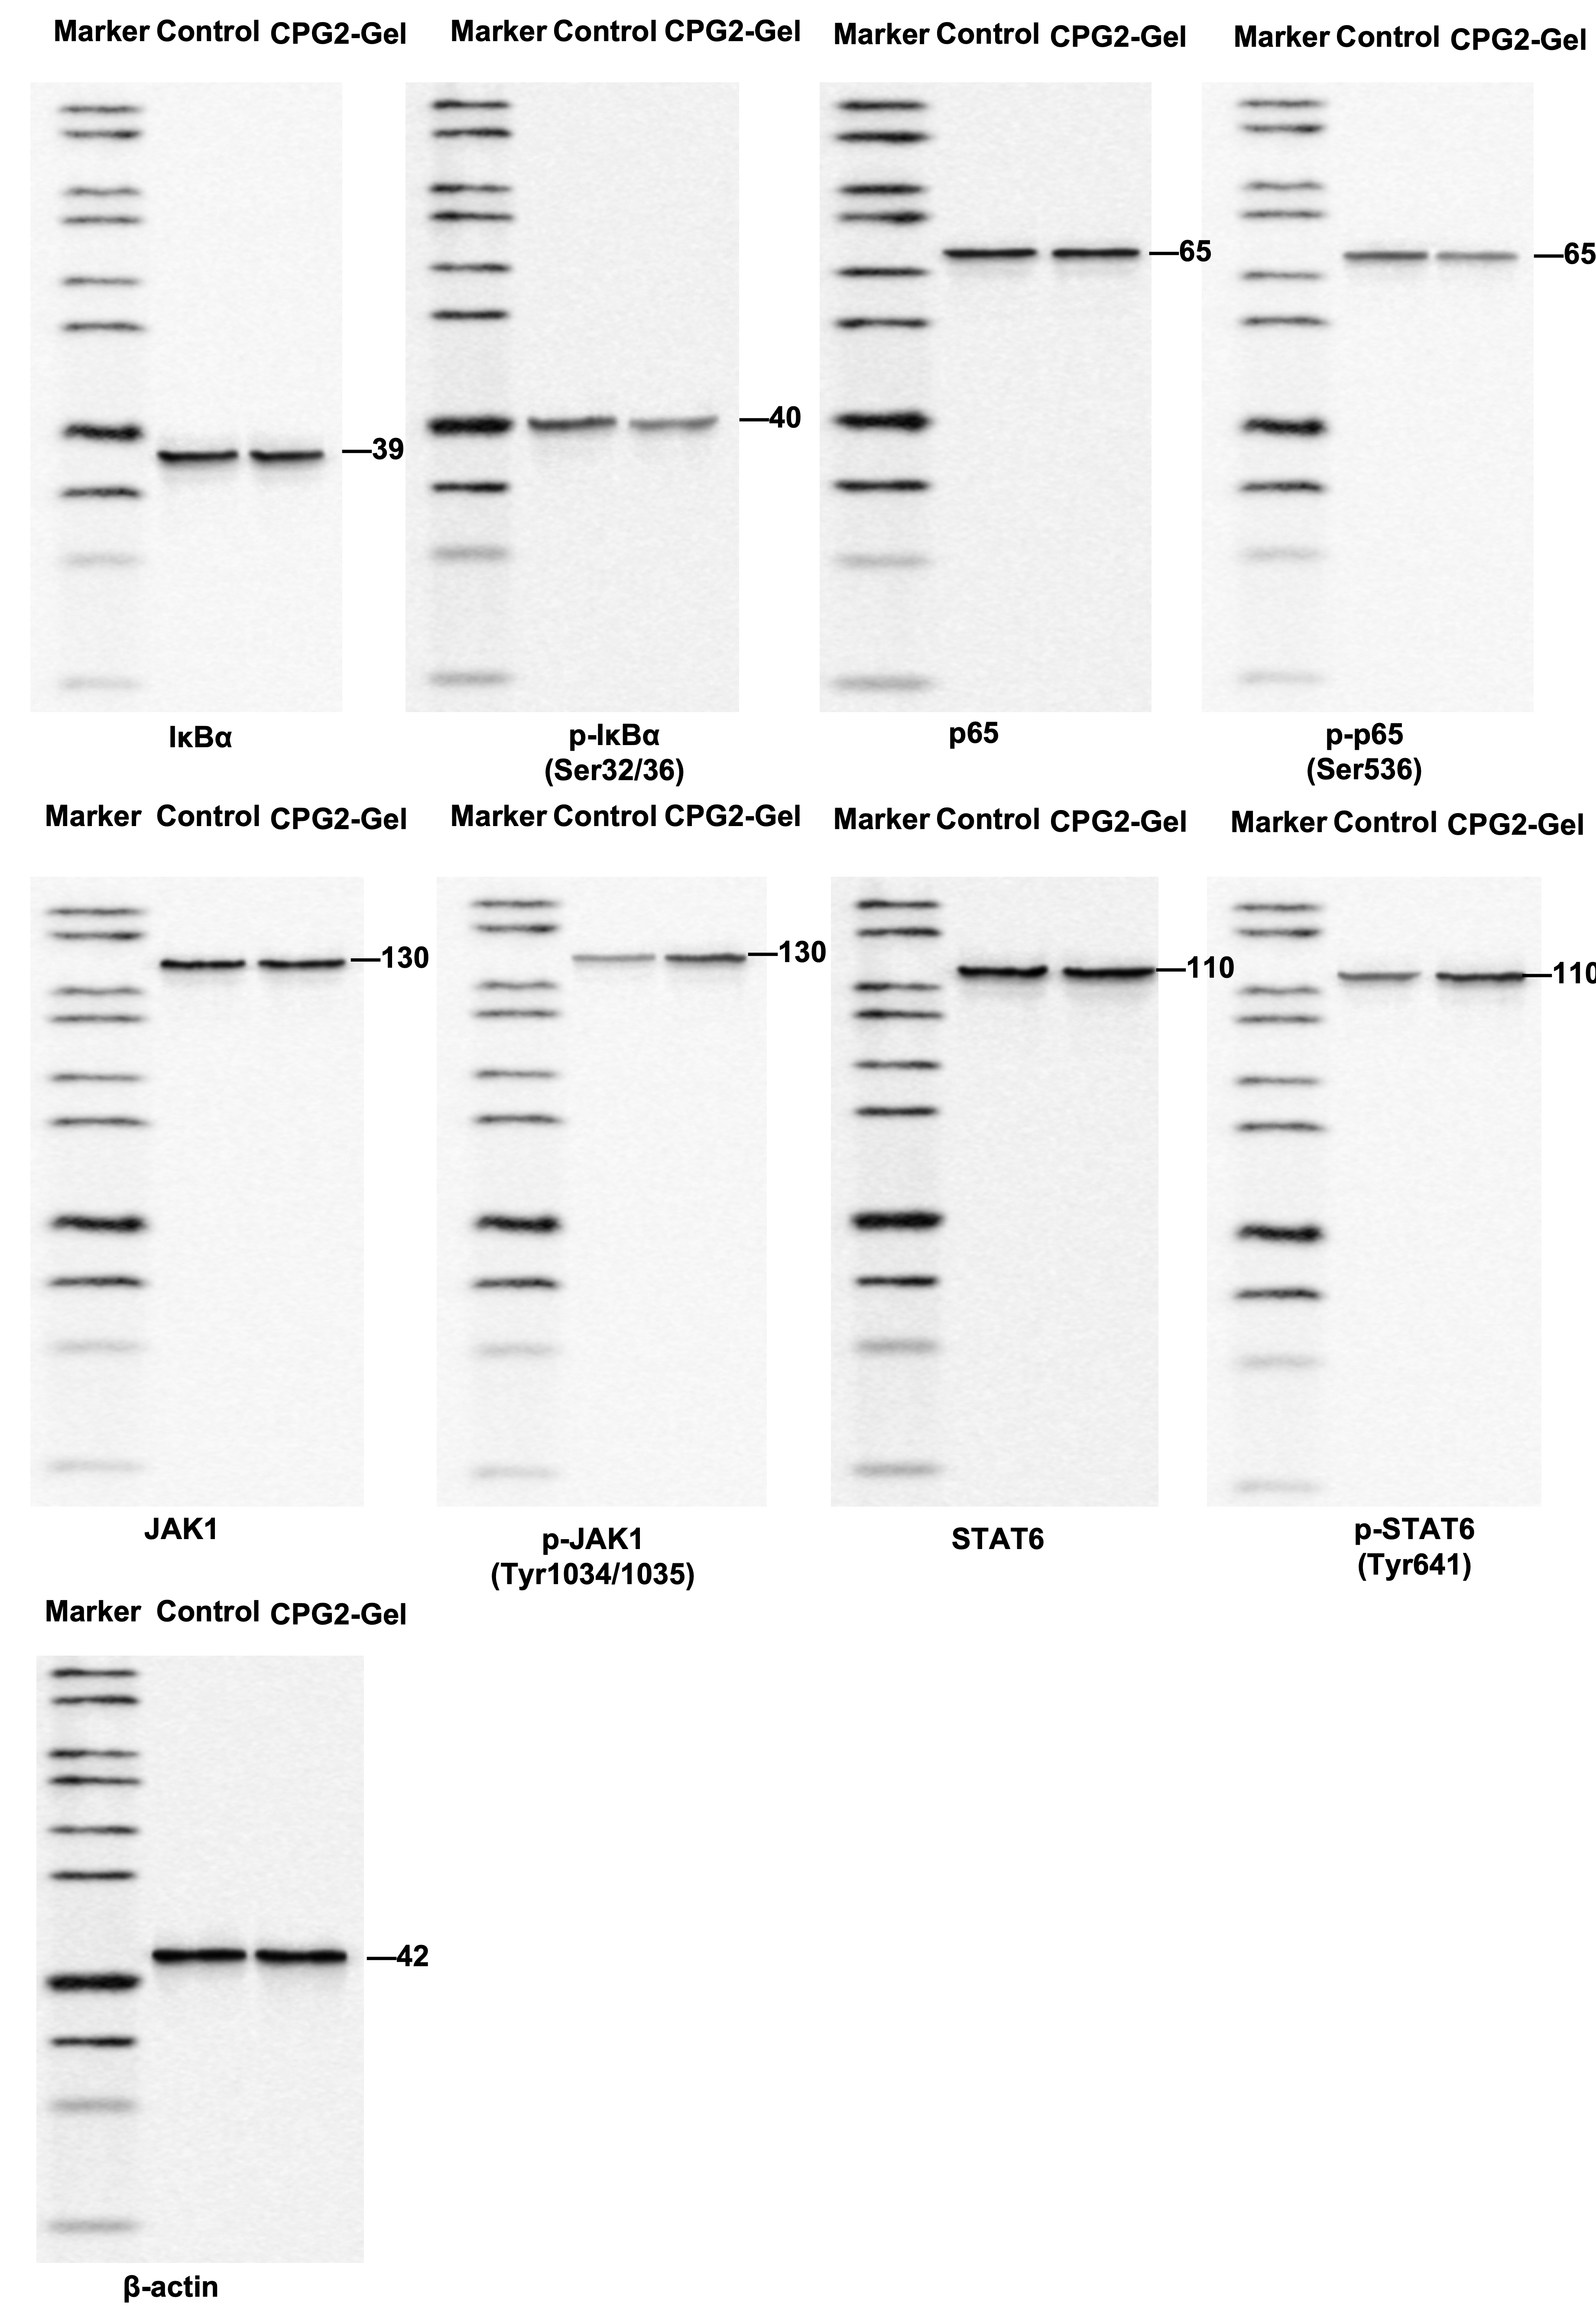
**Figure. S11. The related signaling pathways of CPG2-Gel on RAW 264.7 immune regulation and ROS scavenging.** Protein expression of IκB-α, Phospho-IκBα (Ser32/36), NF-κB p65, Phospho-NF-κB p65 (Ser536), JAK1, Phospho-JAK1(Tyr1034/1035), STAT6, and Phospho-STAT6 (Tyr641) in macrophages analyzed by western blot (n = 3).
